# Supplementary material
Source: PubMed Central journal article supplement (PMC4478949)
Supplement: jn.114.208769_nutrition208769SupplementaryData1.pdf [file jn.114.208769_nutrition208769SupplementaryData1.pdf]

## ONLINE SUPPORTING MATERIAL

### SUPPLEMENTAL METHODS

#### Genotyping Quality Control and Data Preparation for the Genome-Wide Association Study (GWAS)

In a preliminary analysis for sample-level quality control, 10 subjects were excluded, based on gender discrepancy between self-report and genotypes ( $n = 7$ ) and abnormal sex chromosomes ( $n = 3$ ; one XYY male and two XX/XO mosaic females). Sixteen subjects with incomplete anthropometric data were removed. Siblings from 77 families reported entry into the study. These included two siblings from 74 families and three siblings from three families. Pair-wise tests for relatedness and population stratification within all the genotyped samples were performed using PLINK v2 (1) and a set of 25718 single nucleotide polymorphisms (SNPs). All selected SNPs had pair-wise intermarker linkage disequilibrium (LD)  $r^2 < 0.04$  for both short and long-range blocks of SNPs, minor allele frequency  $> 0.1$  and genotype call rates  $> 0.99$ . These analyses identified additional pairs of individuals that appeared closely related to the level of first cousins. In order to reduce effects of relatedness, only one individual from each family was retained. In total, 175 individuals were removed due to relatedness. Finally, principal components analysis was performed using the EIGENSOFT v3.0 software (2) and this same low-LD subset of 25718 SNPs. Based on these analyses, two samples were detected as ethnic outliers (six standard deviations away from the mean) and were dropped. The full data preparation process resulted in a final dataset of 2232 study samples in the GWAS association analysis.

Quality control assessment was performed on 1008829 SNPs. SNPs were excluded in two stages:

In stage one, SNPs were dropped that had less than 95% call rates and then samples with less than 97% call rates ( $n = 57$ ) or that showed cryptic relatedness were dropped.

In stage two, SNPs were dropped that had (a) less than 98% call rates; (b) greater than one Mendelian error using HapMap trios ( $n = 583$ ); (c) greater than one discordant genotype using both HapMap controls ( $n = 880$ ), and (d) discordant genotypes from two or more pairs among the 14 study duplicates ( $n = 1765$ ) allowing for one error. SNPs with extreme deviation from Hardy-Weinberg equilibrium ( $P < 1 \times 10^{-4}$ ) were flagged for future reference and remained in the

## ONLINE SUPPORTING MATERIAL

analysis ( $n = 3512$ ). We also measured LD in our dataset and examined LD plots using the HaploView program (3). The data were checked for batch effects using several methods and no significant batch effects were detected. These methods included a) descriptive statistics per batch (average minor allele frequency, average genotyping call rate across all SNPs for each plate) and b) association test results comparing each batch to the others (average  $P$  value, number of significant results at a particular threshold). The final dataset contained 757337 genotyped SNPs (3512 of these SNPs had  $P < 1 \times 10^{-4}$  for a test of Hardy-Weinberg equilibrium) for 2232 samples after quality control testing and after excluding monomorphic and low minor allele frequency SNPs (minor allele frequency  $< 0.01$ ). Genotype and phenotype data will be deposited in dbGAP.

### GWAS Statistical Analysis

Results for plasma pyridoxal 5'-phosphate (PLP), pyridoxal (PL), and 4-pyridoxic acid (PA) were available for 2158 of the 2232 subjects who had vitamin B-6 intake from fortified foods/supplements  $< 11$  mg/day in the last week and who also had DNA samples that passed the genotype quality control, so the discovery analysis for plasma PLP, PL, and PA relates to these 2158 individuals and 757337 SNPs. The distribution of the plasma PLP, PL, and PA concentrations in the study participants deviated significantly from a normal distribution and a  $\log_{10}$  transformation was used to approximately normalize the PLP, PL, and PA values for the linear regression analyses. Standard descriptive statistics were performed on the observed plasma PLP, PL, and PA concentrations both before and after  $\log_{10}$  transformation. For the GWAS analysis, genotyped and imputed autosomal SNPs that passed quality control were tested for association with both untransformed and  $\log_{10}$  transformed plasma PLP, PL, and PA concentrations, adjusted for age and sex. Sixty-six subjects whose vitamin B-6 intake from fortified foods/supplements was  $> 11$  mg/day in the last week had been removed from the GWAS analysis, and the amount of vitamin B-6 intake from fortified foods/supplements in the last week for the remaining 2158 subjects was also included as a covariate in the analyses of PLP, PL and PA. The genomic control lambda was calculated for the untransformed and  $\log_{10}$  transformed versions of plasma PLP, PL and PA concentrations (**Supplemental Table 4**). In the simple linear regression model, the association test for each marker was performed assuming an

## ONLINE SUPPORTING MATERIAL

additive genetic model (i.e., number of minor alleles, 0, 1, and 2) using PLINK v2. SNPs reaching genome-wide statistical significance ( $P < 5.0 \times 10^{-8}$ ) are presented in **Table 3** of the paper for the analysis of  $\log_{10}$  transformed PLP. No SNP reached genome-wide statistical significance for the analysis of  $\log_{10}$  transformed PL or PA. Manhattan plots and quantile-quantile (Q-Q) plots for PLP (**Supplemental Figures 4-7**) and for PL and PA (**Supplemental Figures 9 and 10**) were generated using R scripts. To further evaluate the distribution of  $P$  values obtained in the analysis of plasma PLP, Q-Q plots without chromosome 1 (this chromosome had the most statistically significant SNPs for plasma PLP) were also generated to remove the effect on the plots of these extremely significant SNPs (Supplemental Figures 4-7).

### References

1. Purcell S, Neale B, Todd-Brown K, Thomas L, Ferreira MA, Bender D, Maller J, Sklar P, de Bakker PI, Daly MJ, et al. PLINK: a tool set for whole-genome association and population-based linkage analyses. *Am J Hum Genet* 2007;81:559-75.
2. Kang HM, Sul JH, Service SK, Zaitlen NA, Kong SY, Friemer NB, Sabatti C, Eskin E. Variance component model to account for sample structure in genome-wide association studies. *Nat Genet* 2010;42:348-54.
3. Barrett JC, Fry B, Maller J, Daly MJ. Haploview: analysis and visualization of LD and haplotype maps. *Bioinformatics* 2005;21:263-5.

ONLINE SUPPORTING MATERIAL

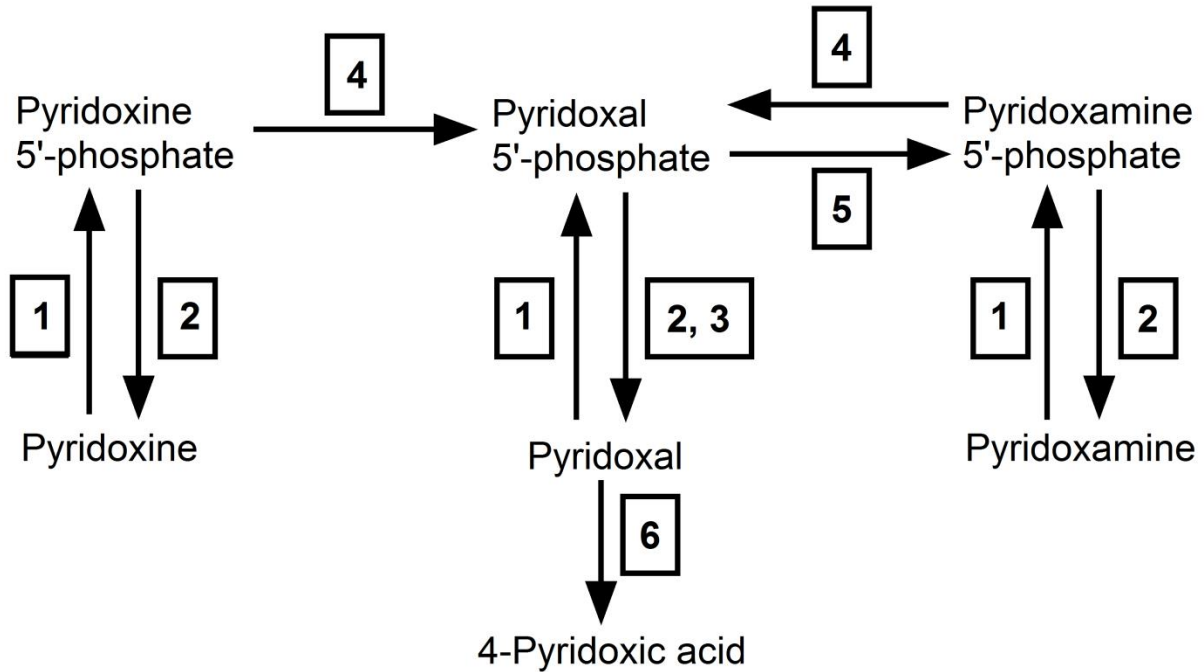

Vitamin B-6 inter-conversion enzymes are:

1. Pyridoxal (pyridoxine, vitamin B6) kinase
2. Pyridoxal phosphatase
3. Alkaline phosphatase
4. Pyridoxamine 5'-phosphate oxidase
5. Transaminase
6. Aldehyde oxidase

SUPPLEMENTAL FIGURE 1 Vitamin B-6 metabolism.

ONLINE SUPPORTING MATERIAL

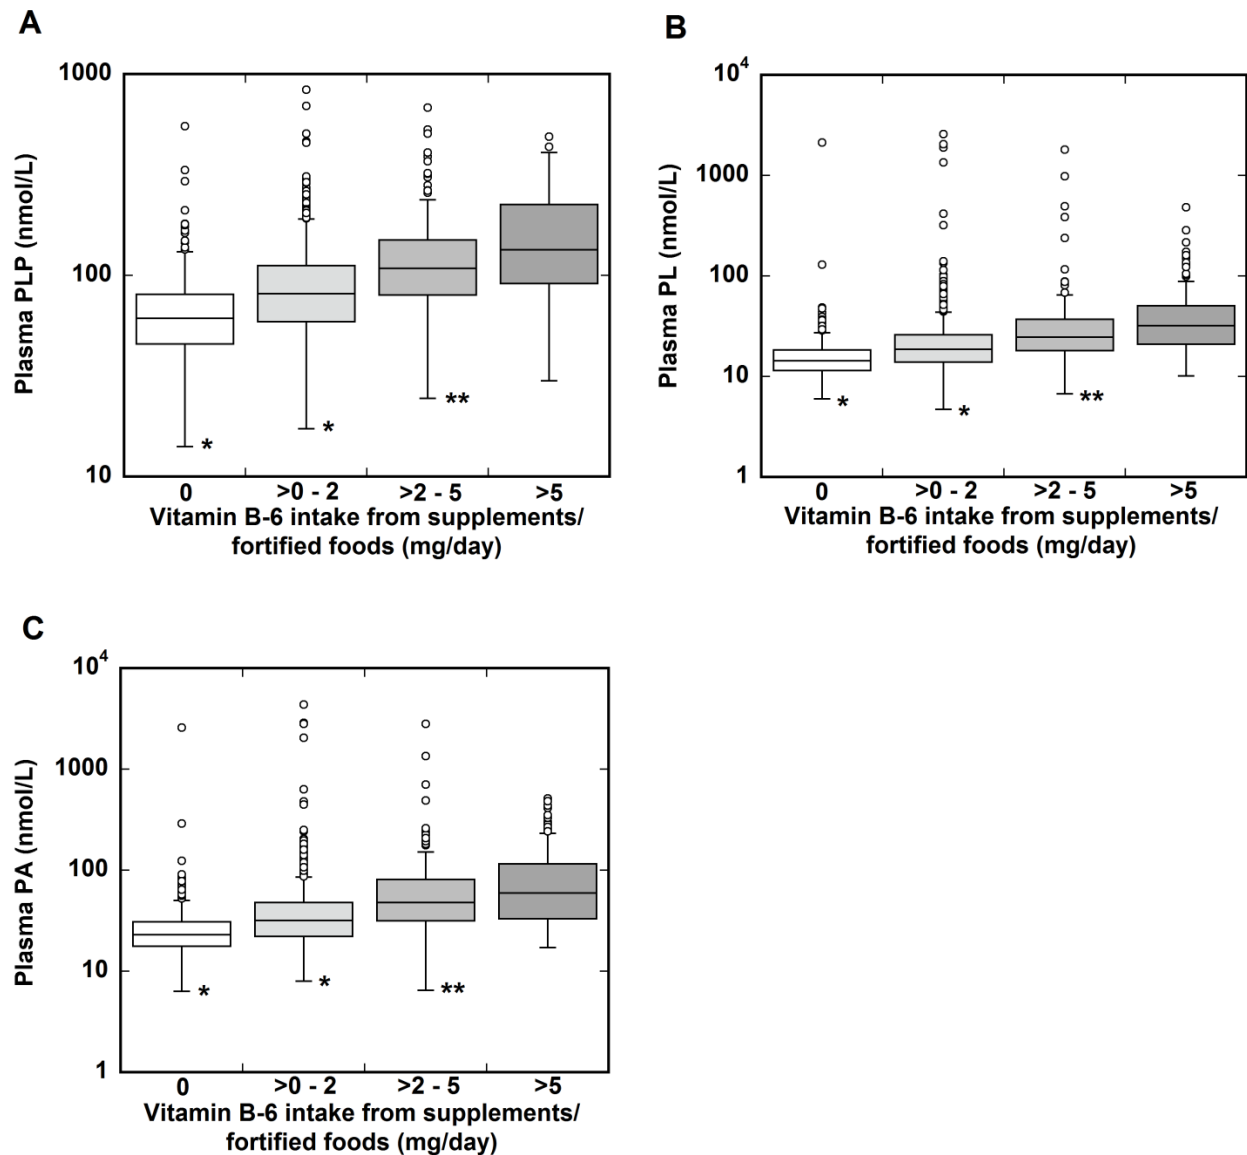

**SUPPLEMENTAL FIGURE 2** Plasma B-6 vitamere concentrations in healthy Irish adults according to category of vitamin B-6 intake from fortified foods/ supplements. Concentrations of (A) PLP, (B) PL, and (C) PA in plasma are presented for all subjects ( $n = 2345$ ) according to four categories of the amount of vitamin B-6 intake from fortified foods/supplements. The number of subjects in the 0, >0 – 2, >2 – 5, and >5 mg/day categories of intake were 337, 1667, 224, and 117, respectively. Wilcoxon rank sum test was used to compare plasma B-6 vitamere concentrations between pairs of vitamin B-6 intake categories. \* $P < 0.0001$  for all comparisons between the indicated category and each higher vitamin B-6 intake category. \*\* $P < 0.05$  for all comparisons between the indicated category and each higher vitamin B-6 intake category. PLP, pyridoxal 5'-phosphate; PL, pyridoxal; PA, 4-pyridoxic acid.

# ONLINE SUPPORTING MATERIAL

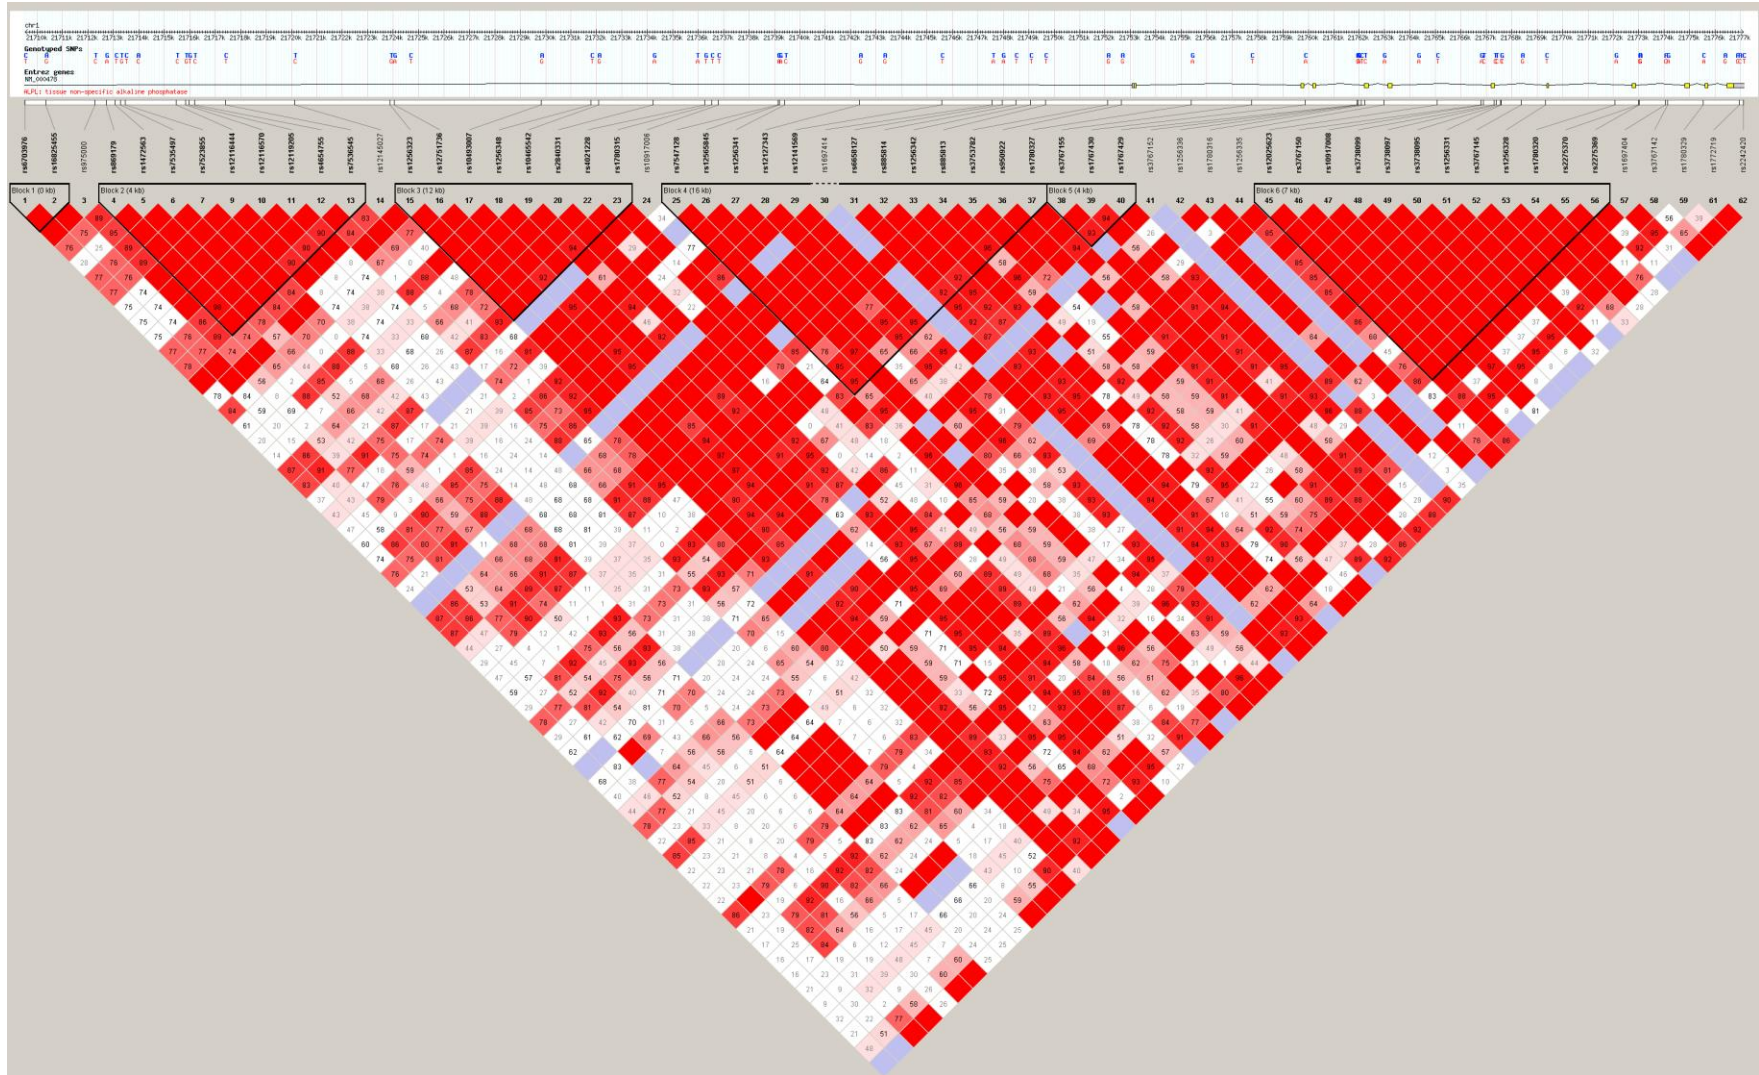

**SUPPLEMENTAL FIGURE 3** Low-resolution diagram of linkage disequilibrium ( $D'$ ) across the *ALPL* gene – based on data for the HapMap CEU population. *ALPL*, tissue non-specific alkaline phosphatase; CEU, sample of Utah residents with Northern and Western European ancestry in the HapMap project.

# ONLINE SUPPORTING MATERIAL

A

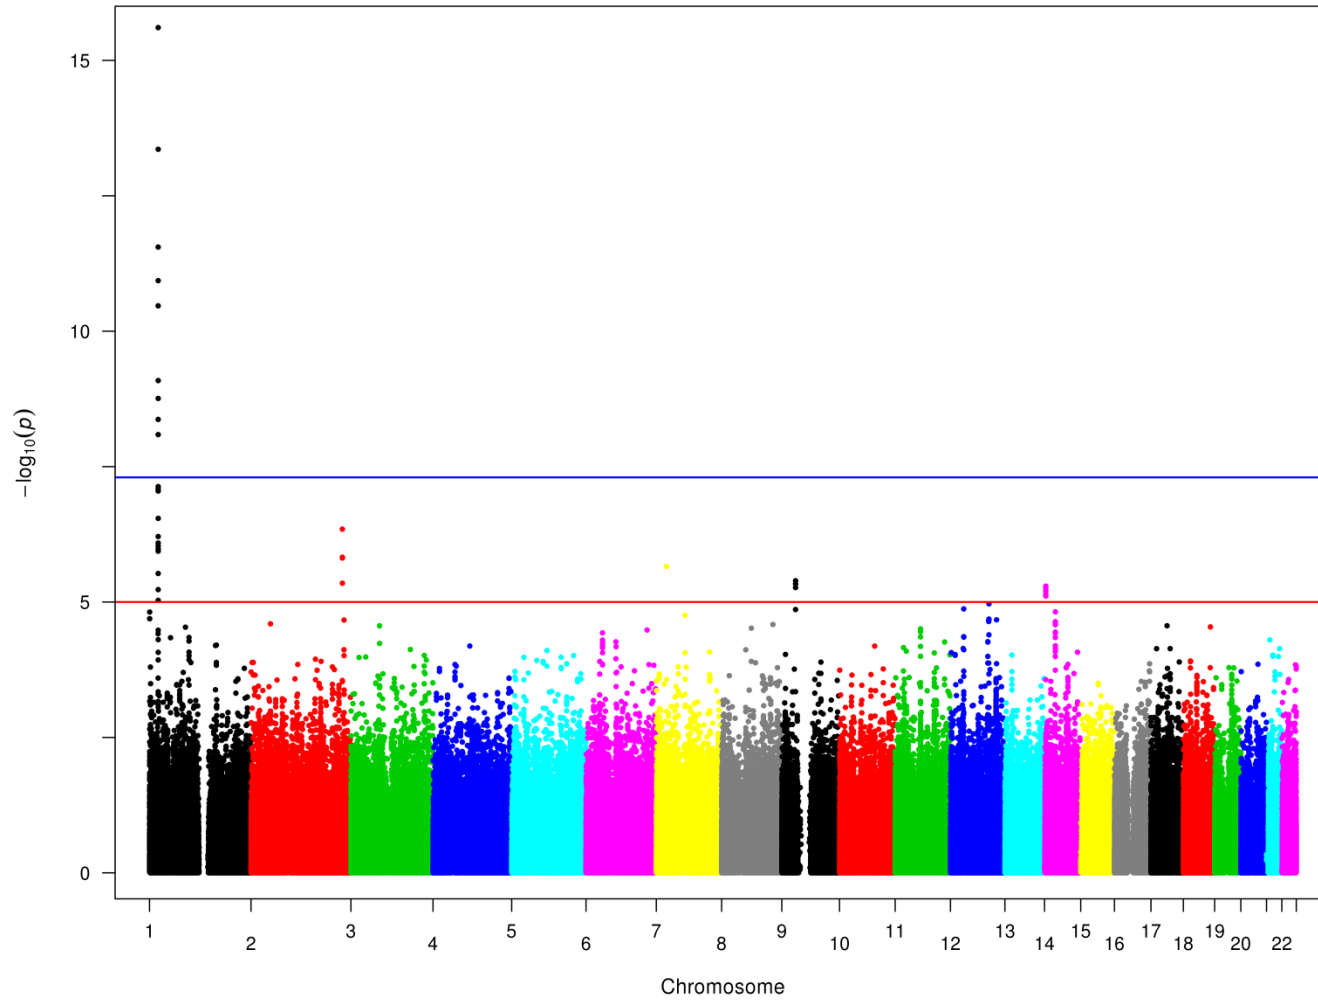

## ONLINE SUPPORTING MATERIAL

**B**

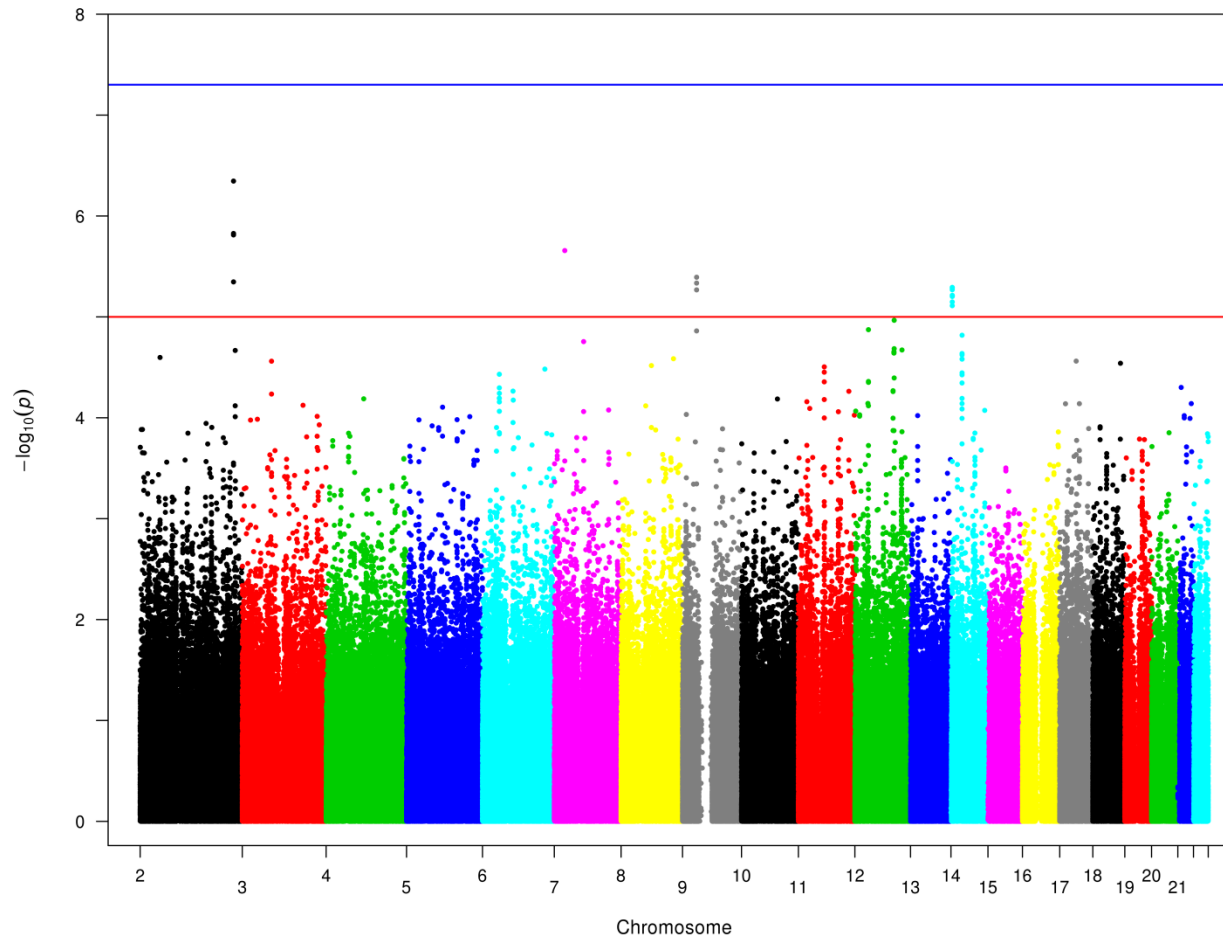

**SUPPLEMENTAL FIGURE 4** (A) Manhattan plot of association results of log<sub>10</sub> transformed plasma pyridoxal 5'-phosphate concentration adjustment for age, sex and vitamin B-6 intake from fortified foods/supplements, using genotype data on 757337 polymorphisms in healthy Irish adults. (B) Same plot excluding chromosome 1. The two horizontal lines in the plots represent thresholds for suggestive significance ( $P = 1 \times 10^{-5}$ ; red line) and genome-wide significance ( $P = 5 \times 10^{-8}$ ; blue line).



A

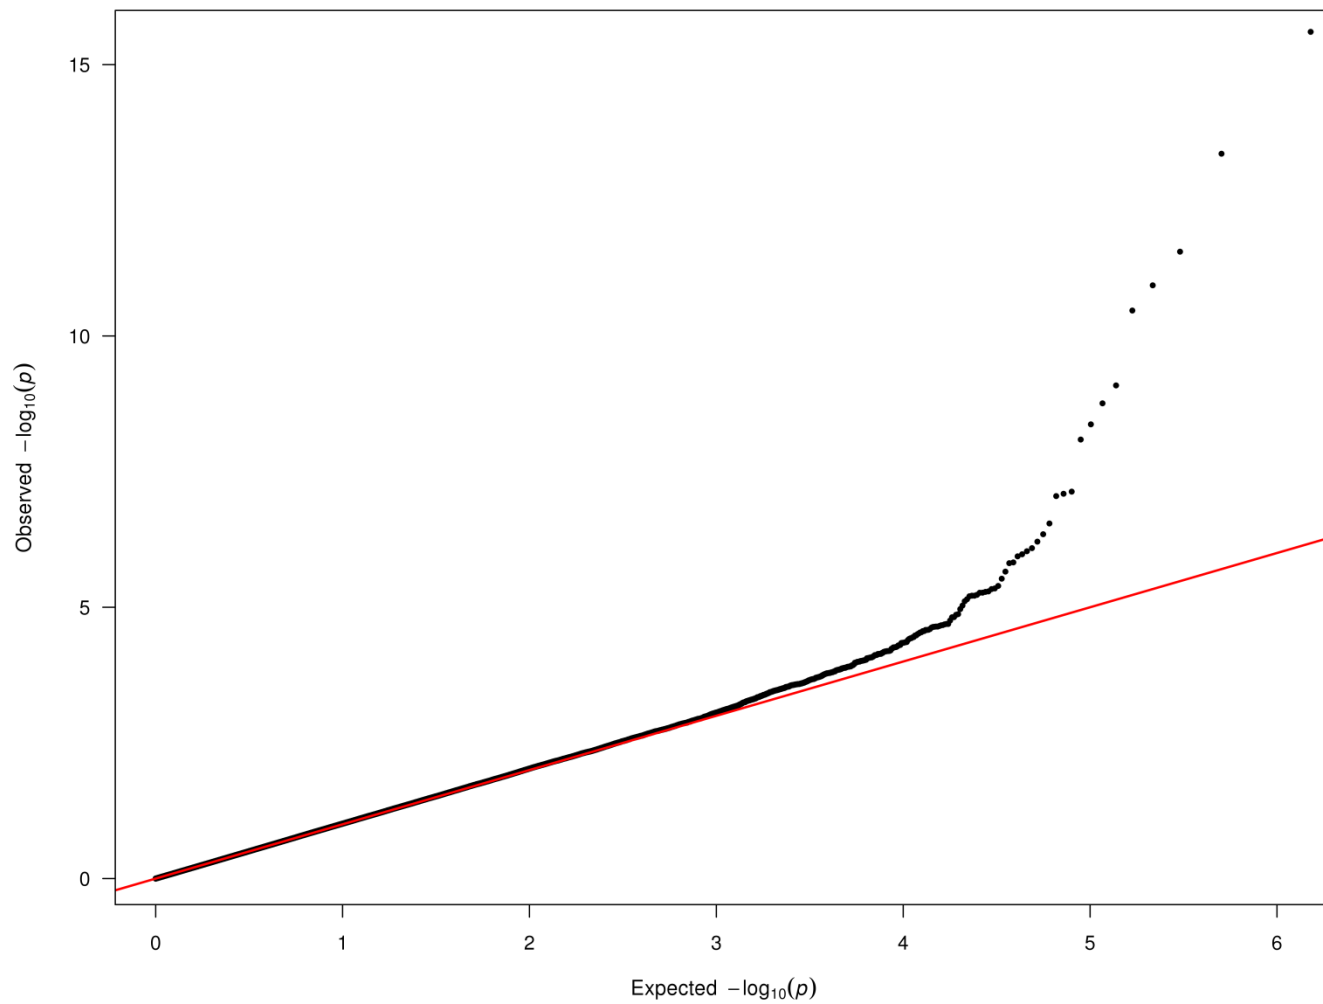

**B**

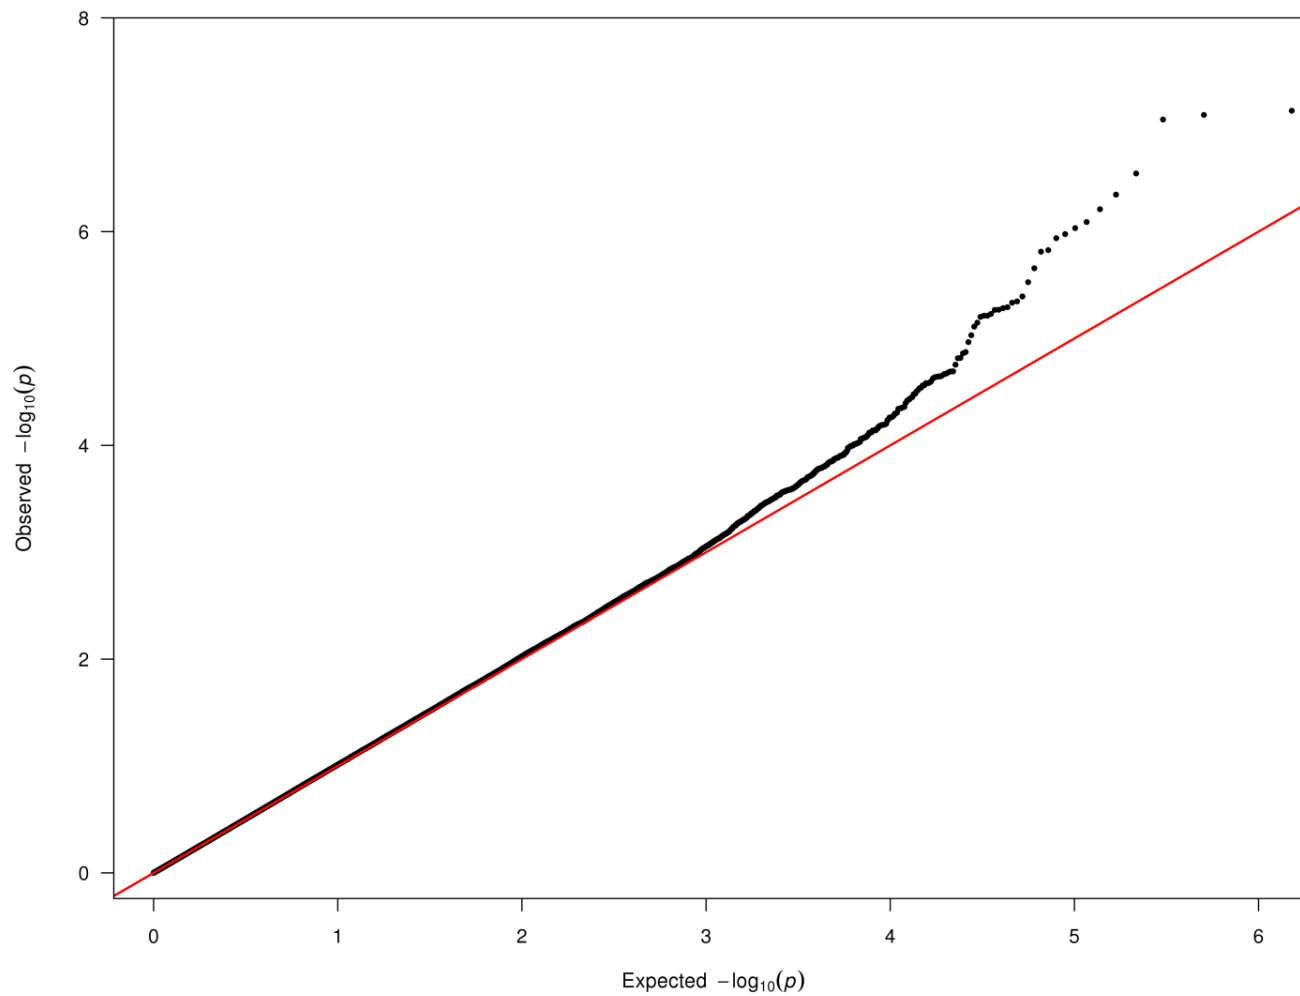

C

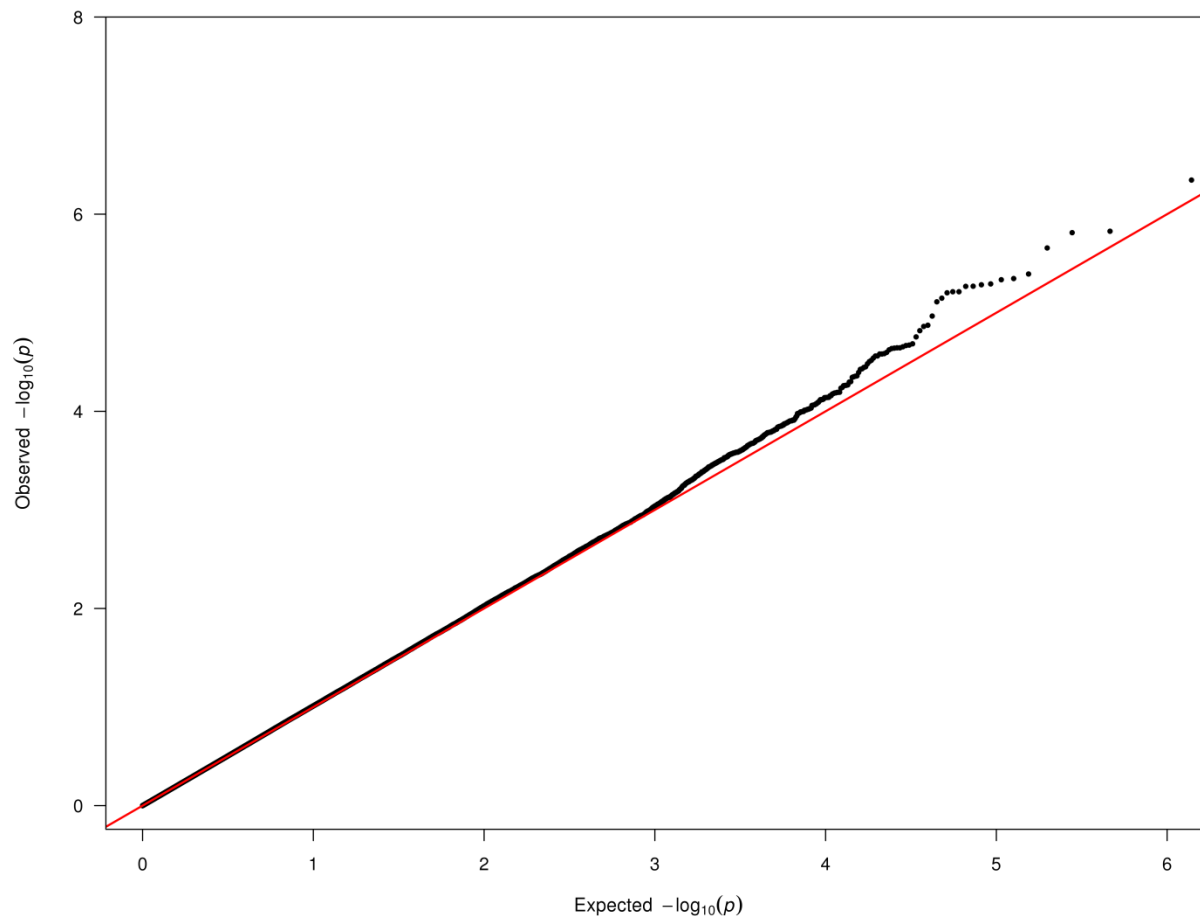

**SUPPLEMENTAL FIGURE 5** Quantile-quantile plots of  $\log_{10}$  transformed plasma pyridoxal 5'-phosphate concentration with adjustment for age, sex and vitamin B-6 intake from fortified foods/supplements, using genotype data on 757337 polymorphisms in healthy Irish adults (A) after quality control testing and (B) truncated at  $-\log_{10}(P) = 8$ . (C) Same plot as in A but excluding chromosome 1.

# ONLINE SUPPORTING MATERIAL

A

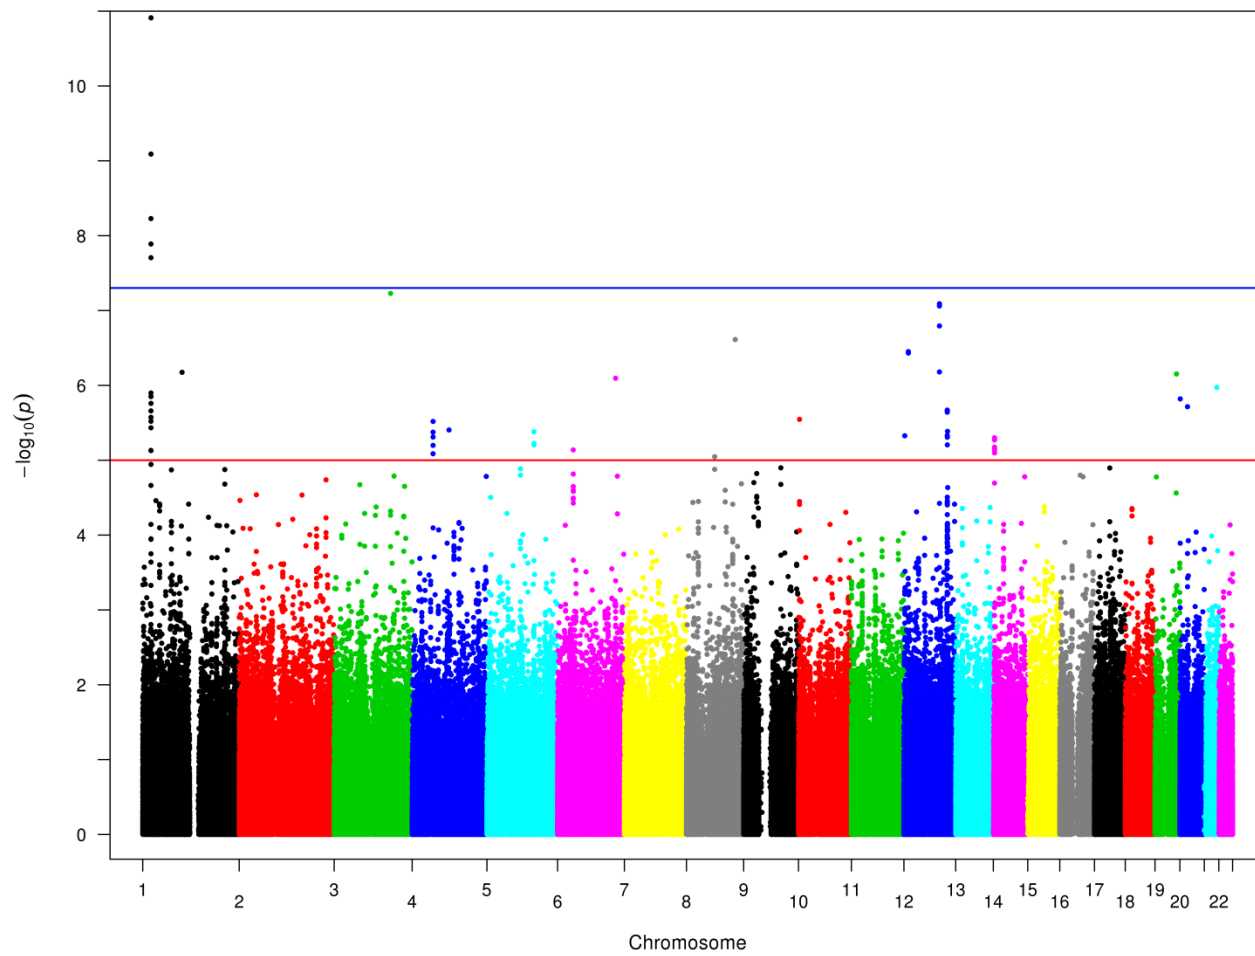

B

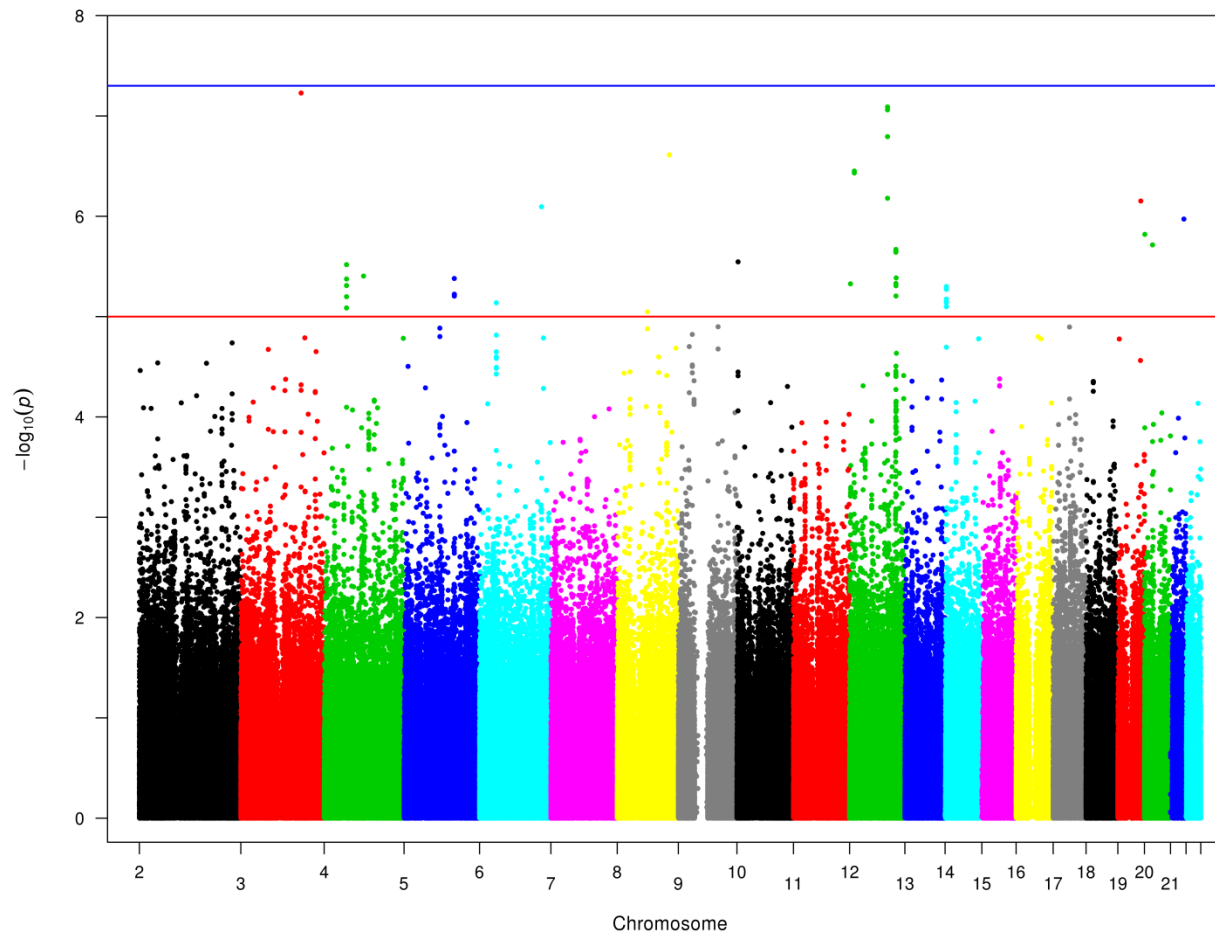

**SUPPLEMENTAL FIGURE 6** (A) Manhattan plot of association results of untransformed plasma pyridoxal 5'-phosphate concentration with adjustment for age, sex and vitamin B-6 intake from fortified foods/supplements, using genotype data on 757337 polymorphisms in healthy Irish adults. (B) Same plot excluding chromosome 1. The two horizontal lines in the plots represent thresholds for suggestive significance ( $P = 1 \times 10^{-5}$ ; red line) and genome-wide significance ( $P = 5 \times 10^{-8}$ ; blue line).

# ONLINE SUPPORTING MATERIAL

A

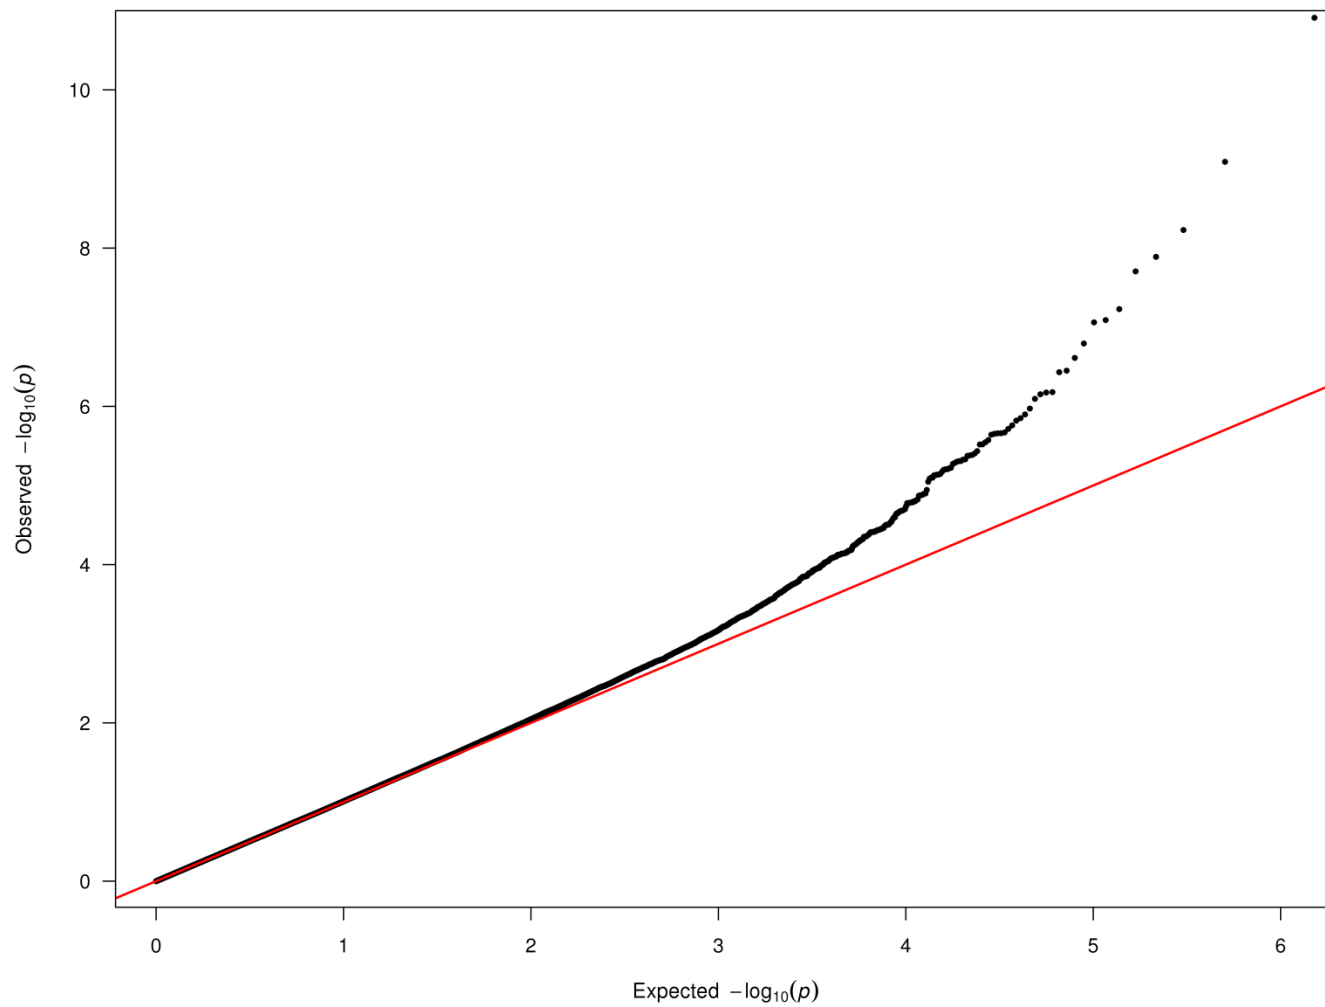

**B**

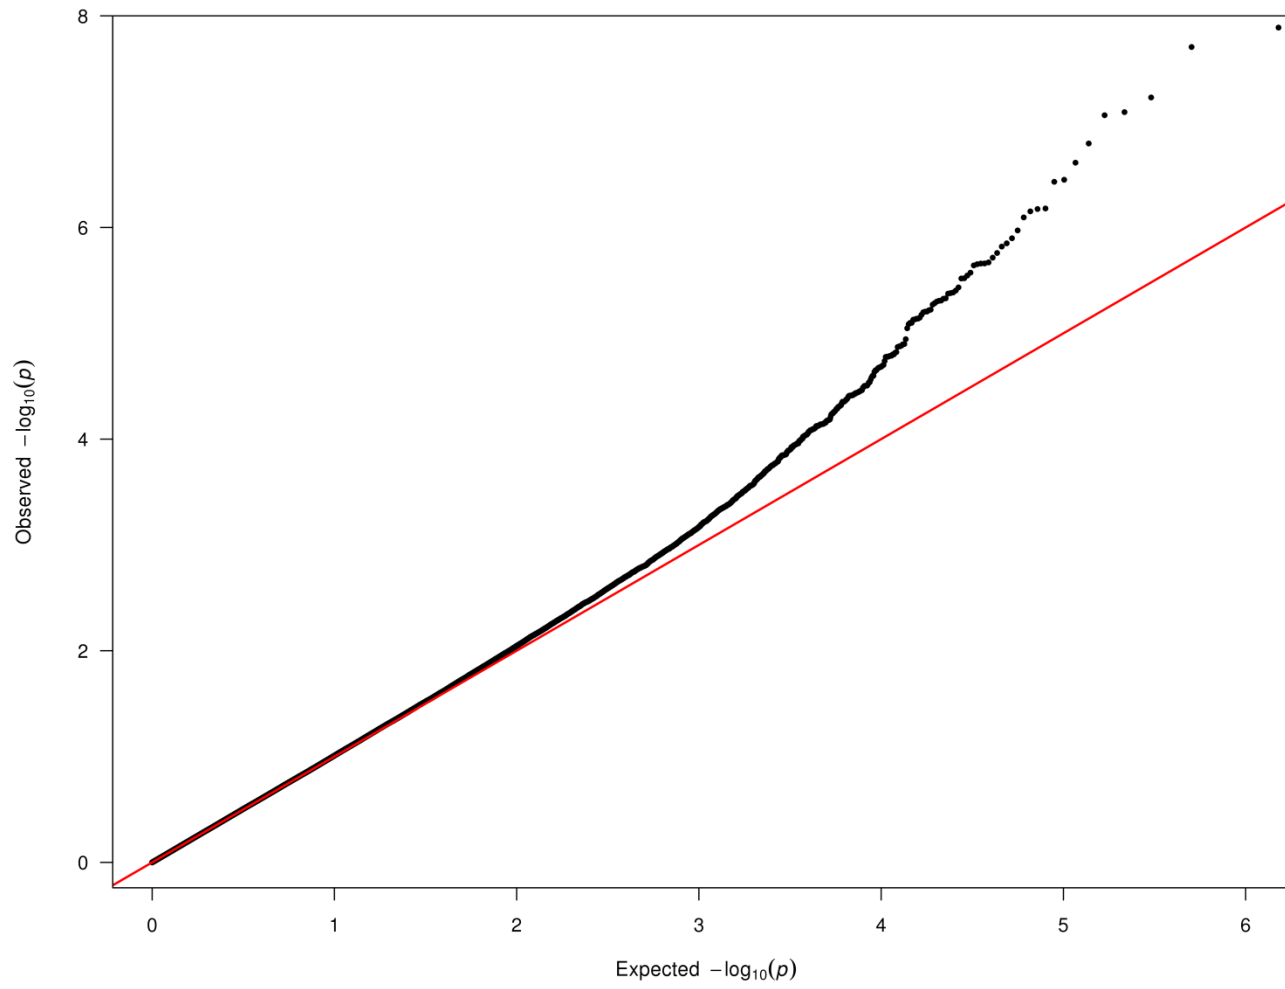

C

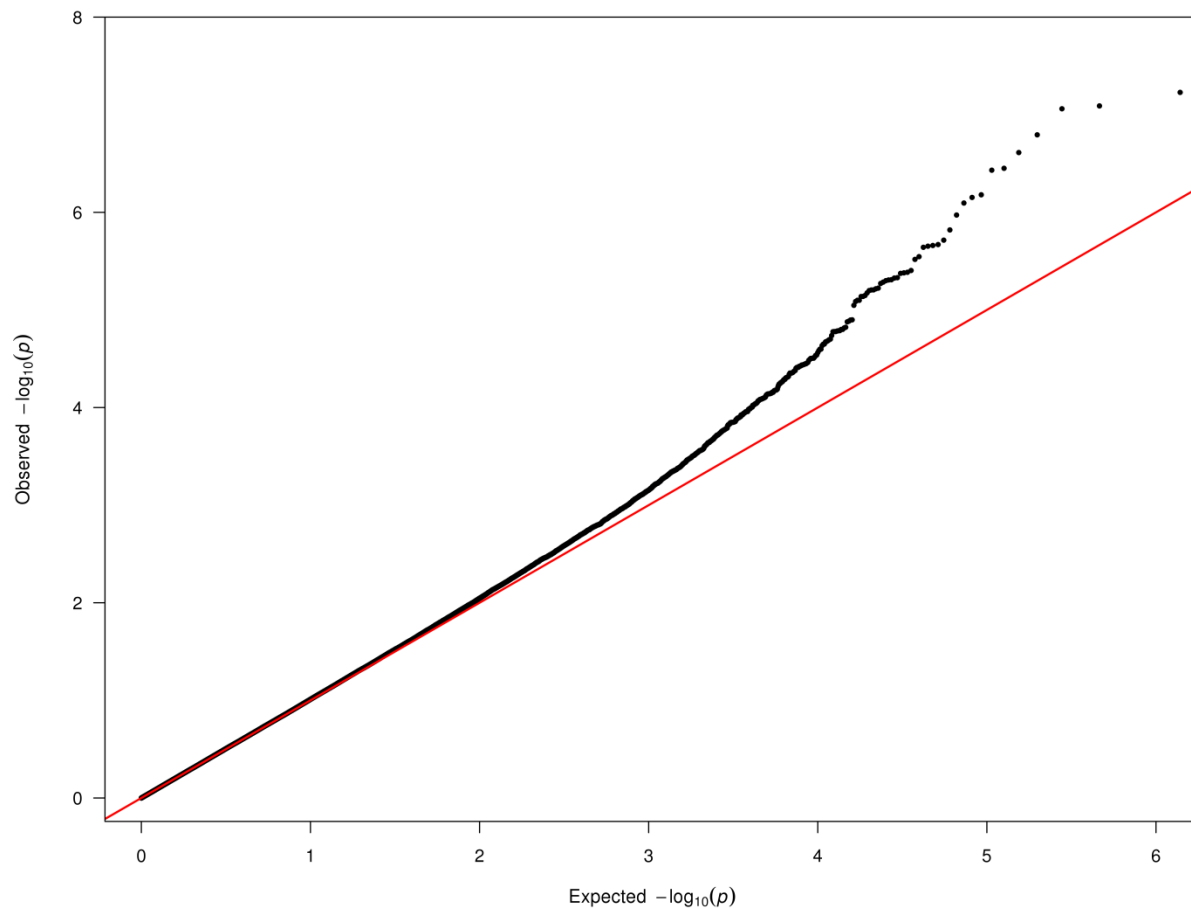

**SUPPLEMENTAL FIGURE 7** Quantile-quantile plots of untransformed plasma pyridoxal 5'-phosphate concentration with adjustment for age, sex and vitamin B-6 intake from fortified foods/supplements, using genotype data on 757337 polymorphisms in healthy Irish adults (A) after quality control testing and (B) truncated at  $-\log_{10}(P) = 8$ . (C) Same plot as in A but excluding chromosome 1.



## ONLINE SUPPORTING MATERIAL

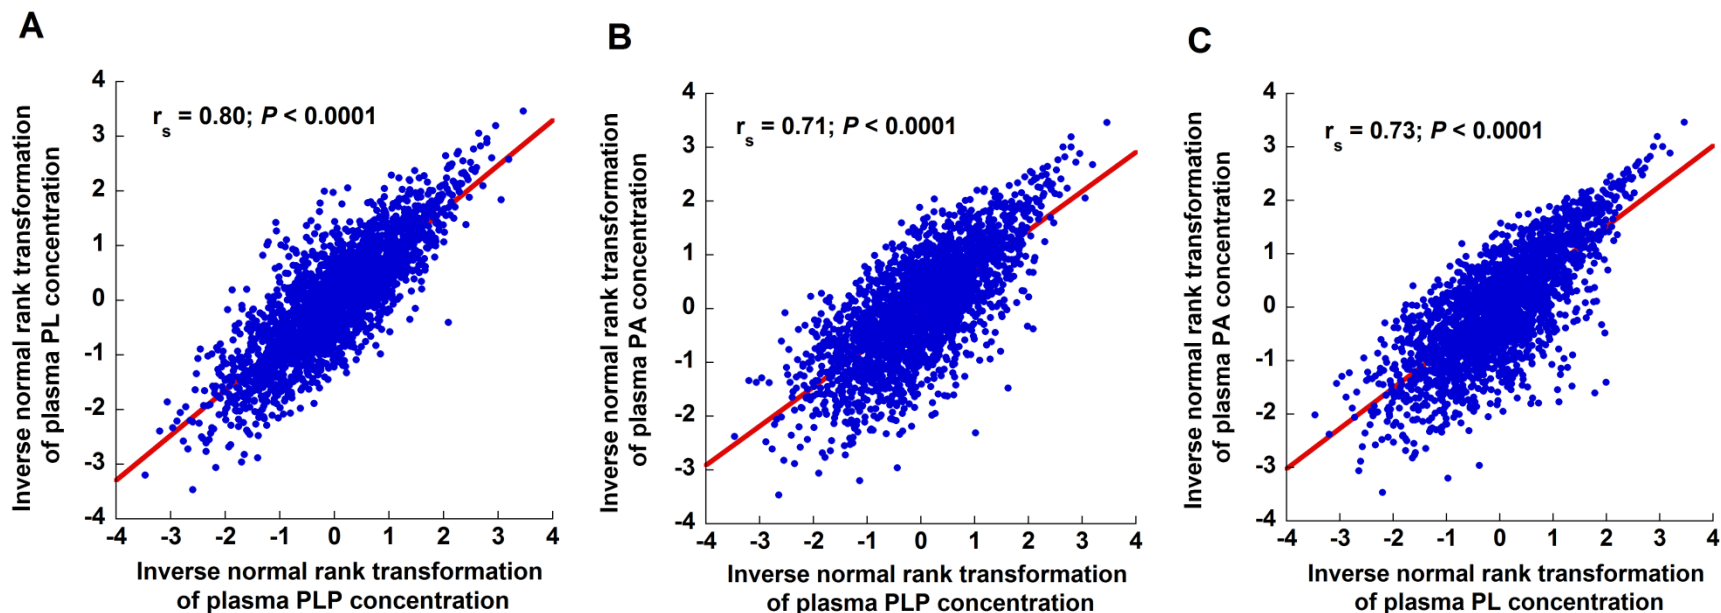

**SUPPLEMENTAL FIGURE 8** Correlations between plasma PLP, PL, and PA concentrations in healthy Irish adults, represented by scatter plots with a linear regression line. Spearman rank correlation coefficients ( $r_s$ ) were calculated for the associations between (A) plasma PLP and PL concentrations, (B) plasma PLP and PA concentrations, and (C) plasma PL and PA concentrations. Before testing for correlation, an inverse normal rank transformation of plasma PLP, PL, and PA concentrations was performed to generate normally distributed data. PLP, pyridoxal 5'-phosphate; PL, pyridoxal; PA, 4-pyridoxic acid.

ONLINE SUPPORTING MATERIAL

A

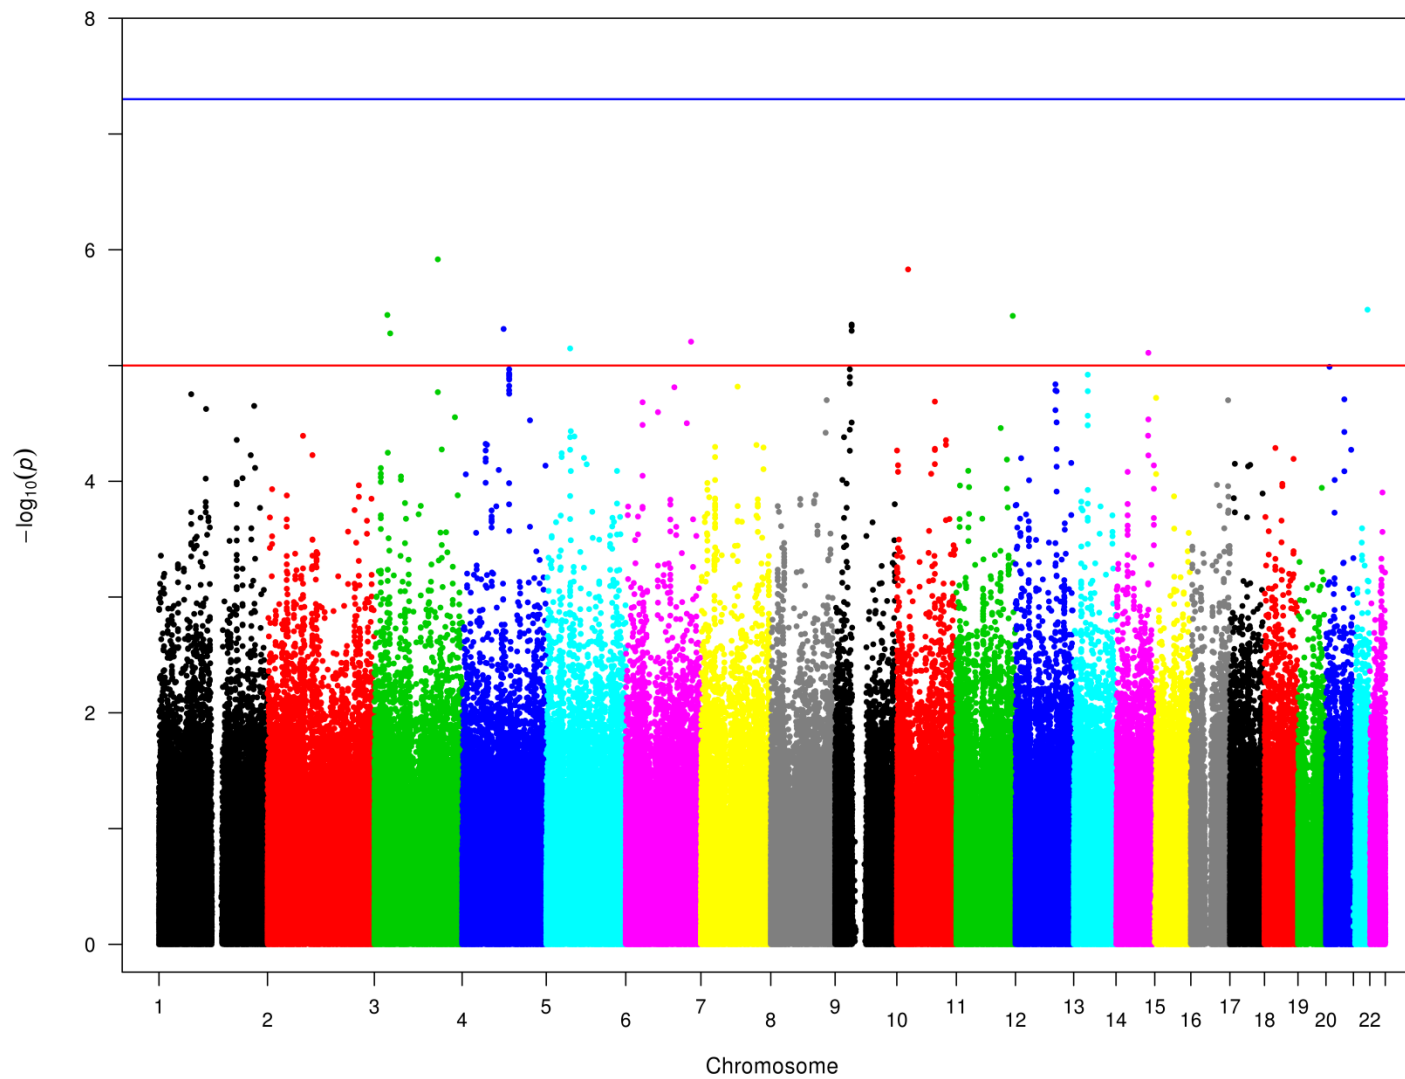

**B**

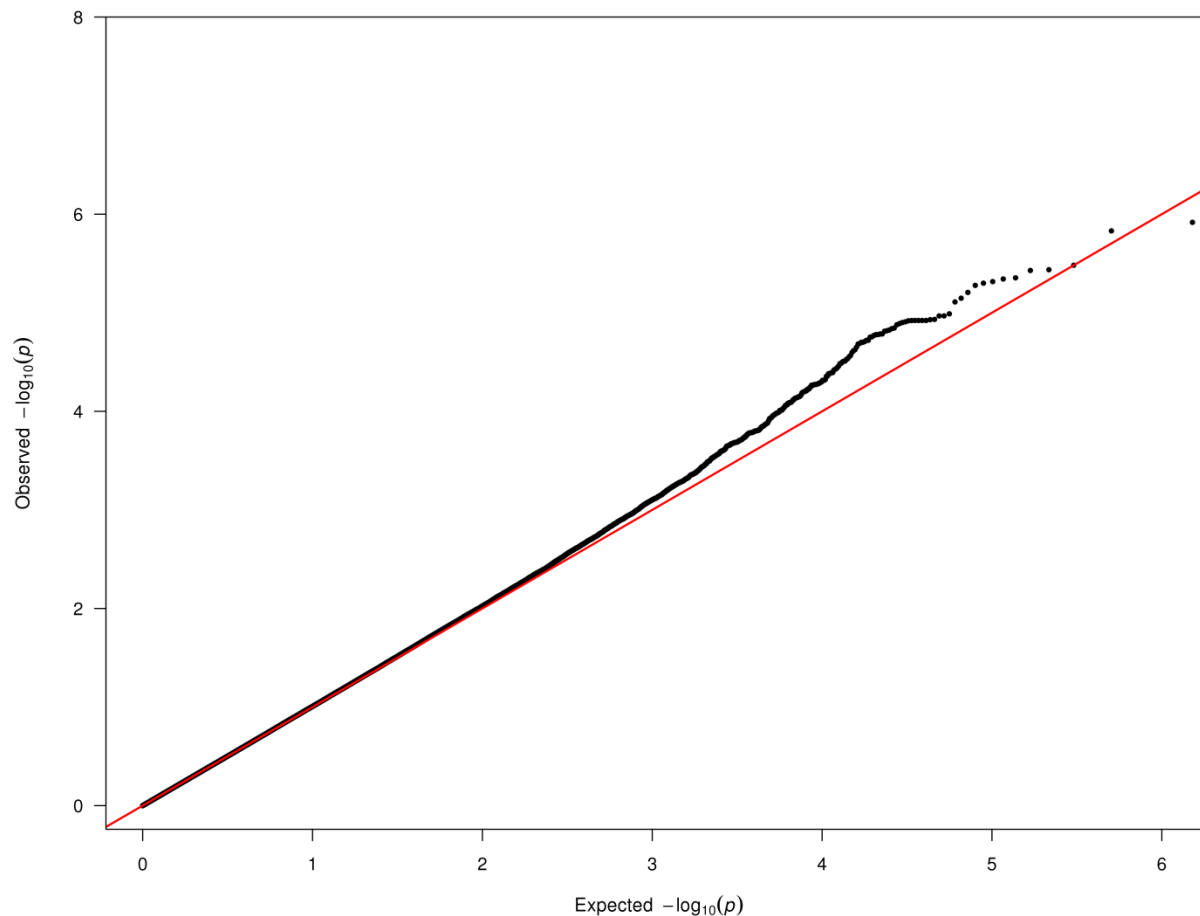

**SUPPLEMENTAL FIGURE 9** (A) Manhattan plot and (B) quantile-quantile plot of  $\log_{10}$  transformed plasma pyridoxal concentration with adjustment for age, sex and vitamin B-6 intake from fortified foods/supplements, using genotype data on 757337 polymorphisms in healthy Irish adults. In the Manhattan plot, the two horizontal lines represent thresholds for suggestive significance ( $P = 1 \times 10^{-5}$ ; red line) and genome-wide significance ( $P = 5 \times 10^{-8}$ ; blue line).

ONLINE SUPPORTING MATERIAL

A

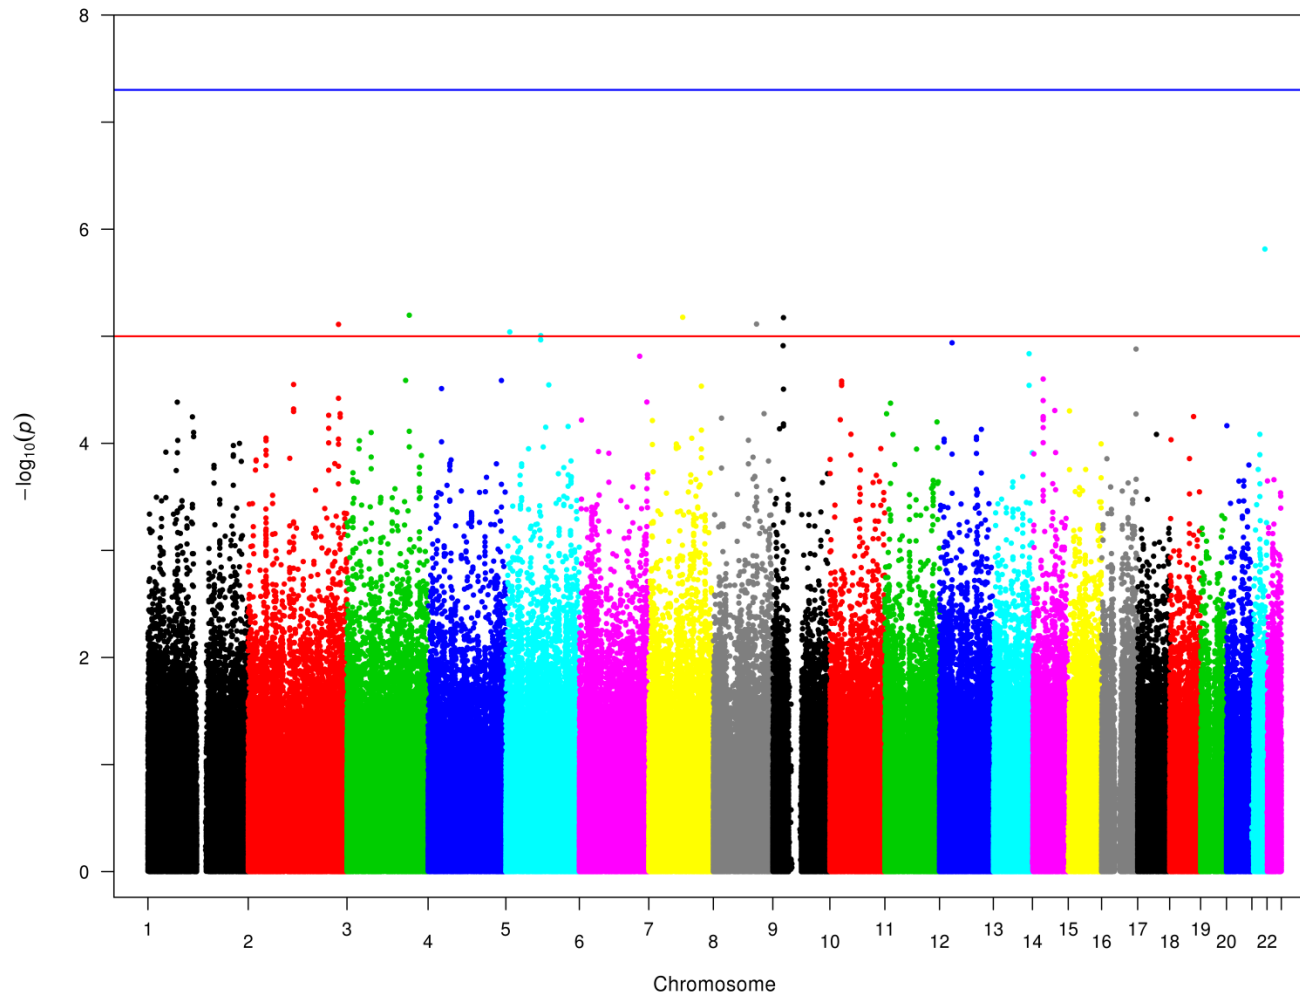

## ONLINE SUPPORTING MATERIAL

**B**

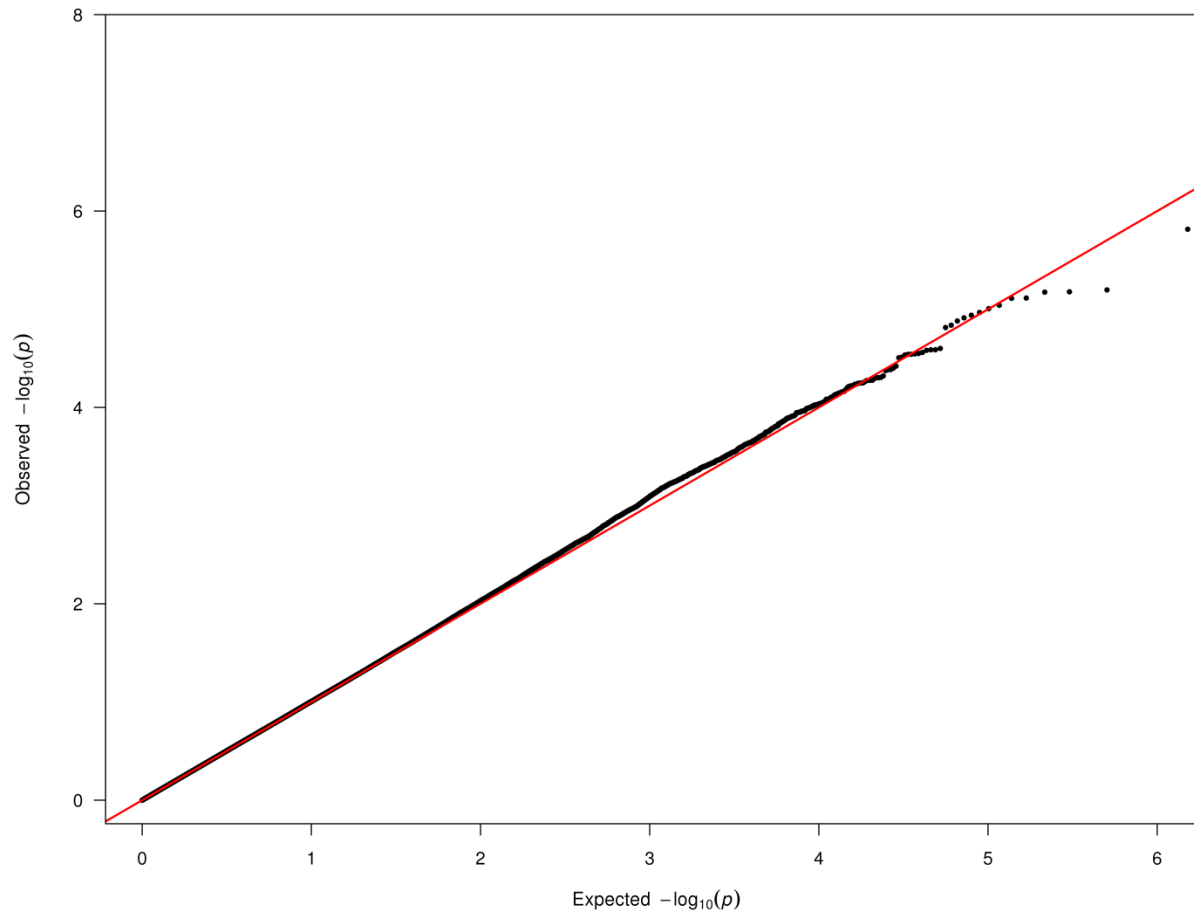

**SUPPLEMENTAL FIGURE 10** (A) Manhattan plot and (B) quantile-quantile plot of  $\log_{10}$  transformed plasma 4-pyridoxic acid concentration with adjustment for age, sex and vitamin B-6 intake from fortified foods/supplements, using genotype data on 757337 polymorphisms in healthy Irish adults. In the Manhattan plot, the two horizontal lines represent thresholds for suggestive significance ( $P = 1 \times 10^{-5}$ ; red line) and genome-wide significance ( $P = 5 \times 10^{-8}$ ; blue line).

ONLINE SUPPORTING MATERIAL

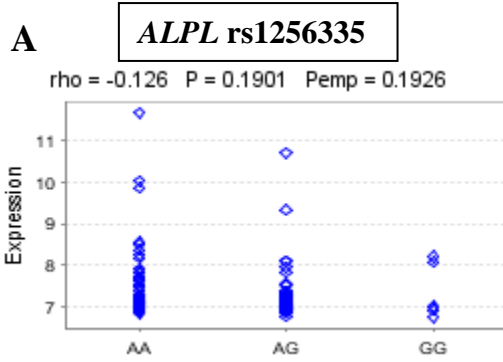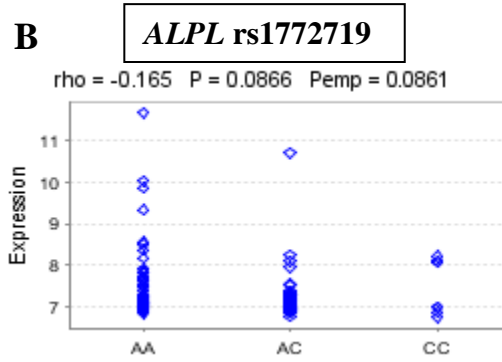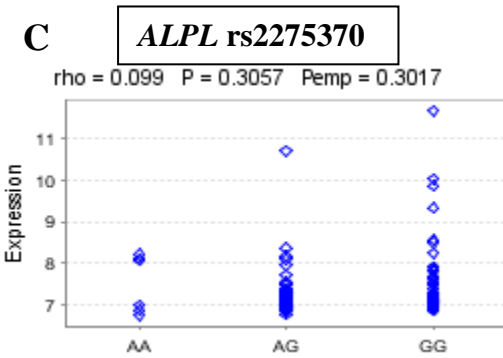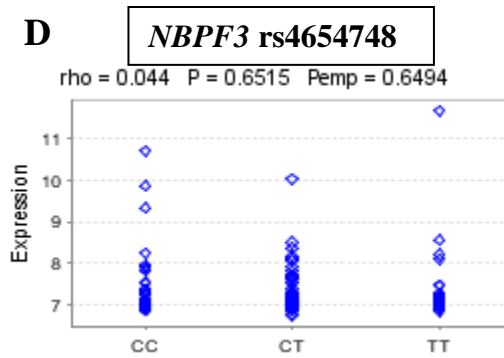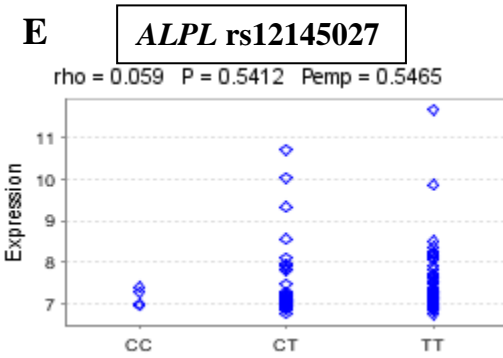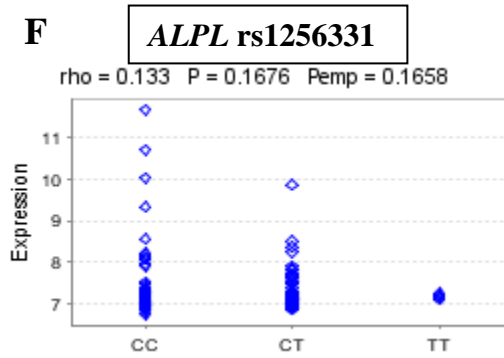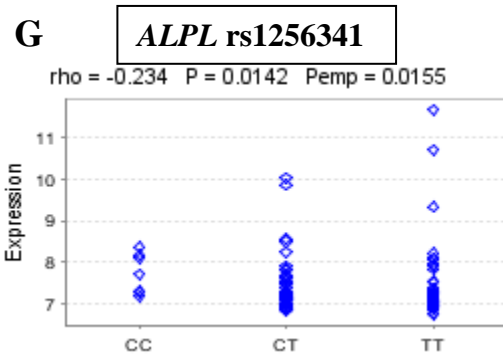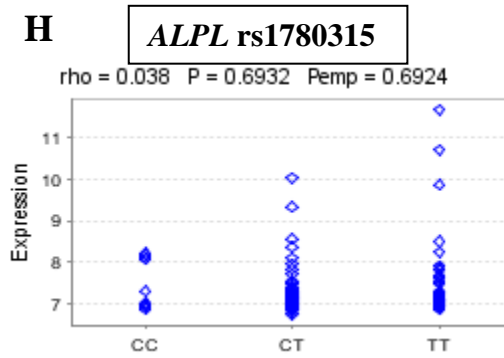

ONLINE SUPPORTING MATERIAL

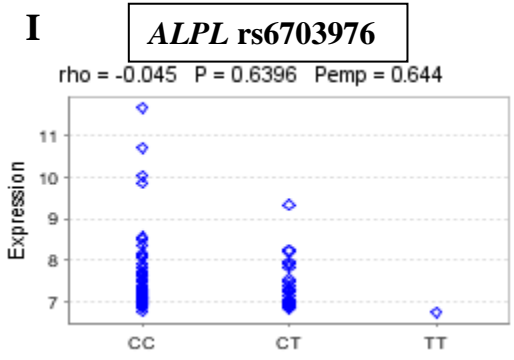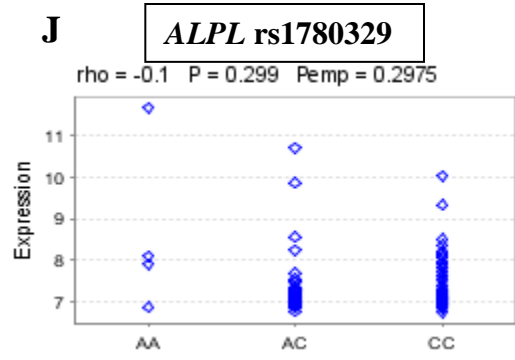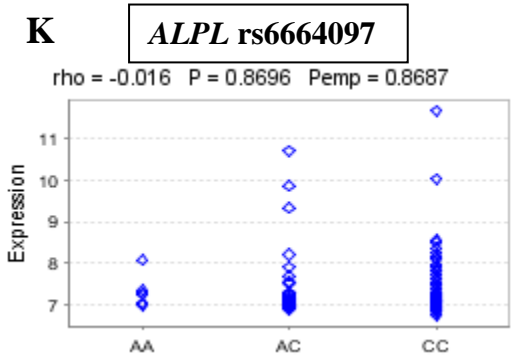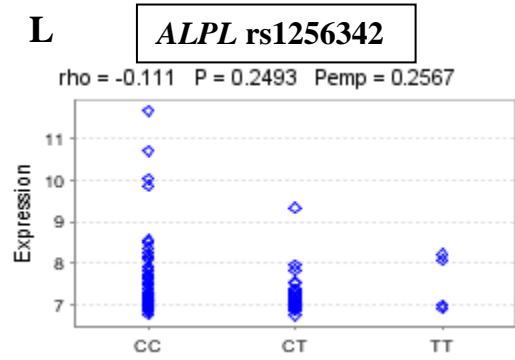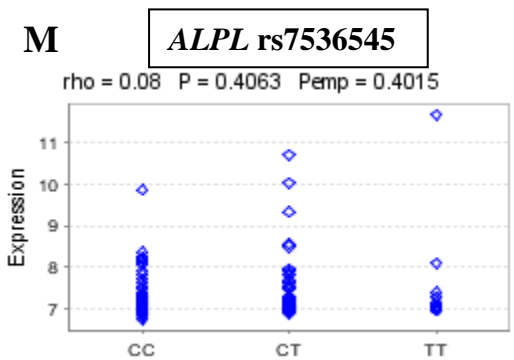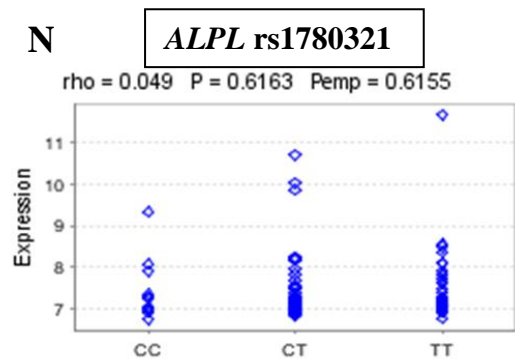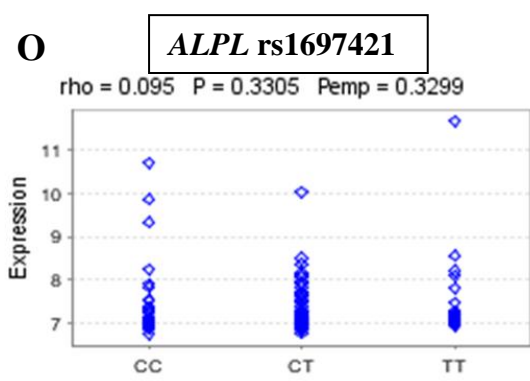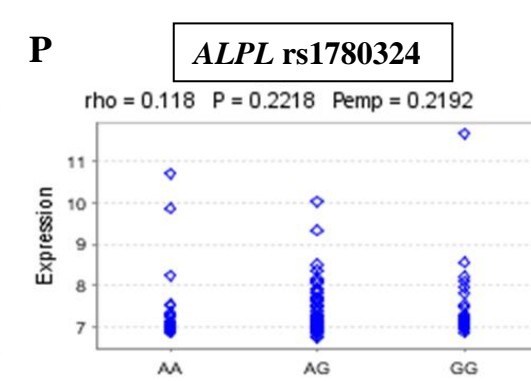

## ONLINE SUPPORTING MATERIAL

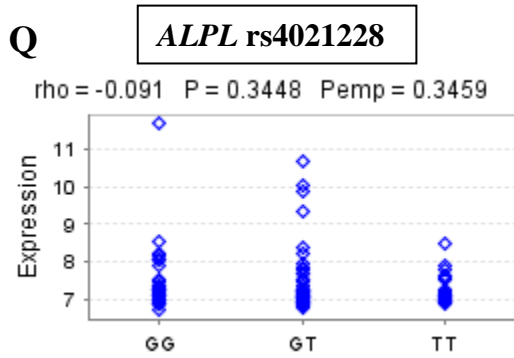

**SUPPLEMENTAL FIGURE 11** Association between *ALPL* gene expression and *ALPL* SNP genotypes in lymphoblastoid cell lines from the HapMap CEU population. Permutation ( $n = 10000$ ) was used to generate adjusted  $P$  values (Pemp). *ALPL*, tissue non-specific alkaline phosphatase; CEU, sample of Utah residents with Northern and Western European ancestry in the HapMap project; SNP, single nucleotide polymorphism.



## ONLINE SUPPORTING MATERIAL

**SUPPLEMENTAL TABLE 1** Characteristics of the study sample of healthy Irish adults ( $n = 2345$ )

| Characteristic                                    | Vitamin B-6 intake from fortified foods/supplements |                     | <i>P</i> <sup>1</sup> |
|---------------------------------------------------|-----------------------------------------------------|---------------------|-----------------------|
|                                                   | Yes<br>( $n = 2008$ )                               | No<br>( $n = 337$ ) |                       |
| Male, $n$ (%)                                     | 850 (42.3)                                          | 127 (37.7)          | 0.12                  |
| Age, <sup>2,3</sup> years                         | 22 (21 – 23)                                        | 23 (21 – 24)        | 0.03                  |
| Body mass index, <sup>2,3</sup> kg/m <sup>2</sup> | 22.6 (21.1 – 24.5)                                  | 22.4 (20.9 – 24.0)  | 0.04                  |
| Alcohol intake, <sup>2,3</sup> g/day              | 19.4 (10.0 – 34.1)                                  | 17.6 (10.0 – 31.5)  | 0.30                  |
| Serum cotinine, <sup>2,3</sup> nmol/L             | 5.0 (1.5 – 18.7)                                    | 5.2 (1.6 – 34.2)    | 0.40                  |
| Plasma creatinine, <sup>2</sup> μmol/L            | 64.8 (56.5 – 74.6)                                  | 63.4 (55.9 – 74.1)  | 0.43                  |

<sup>1</sup>Comparison between subjects who consumed vitamin B-6 from fortified foods/supplements and subjects who did not consume vitamin B-6 from fortified foods/supplements; Fisher's exact test used to compare the proportion of males; Wilcoxon rank sum test used to compare other characteristics.

<sup>2</sup>Values are median (inter-quartile range).

<sup>3</sup>16 subjects had missing data for age, 30 subjects had missing data for body mass index, 2 subjects had missing data for alcohol intake, and 63 subjects had missing data for serum cotinine.

**ONLINE SUPPORTING MATERIAL**

**SUPPLEMENTAL TABLE 2** Tests for associations between SNPs in vitamin B-6 metabolism genes and plasma PLP concentration in healthy Irish adults<sup>1</sup>

| SNP        | Chr | Base pair position <sup>2</sup> | Gene        | Gene region                            | Major, minor alleles | Minor allele frequency | $\beta^3$ | Standard error | <i>P</i>                |
|------------|-----|---------------------------------|-------------|----------------------------------------|----------------------|------------------------|-----------|----------------|-------------------------|
| rs4654748  | 1   | 21786068                        | <i>ALPL</i> | 5' near gene<br>( <i>NBPF3</i> intron) | C, T                 | 0.48                   | 0.15      | 0.03           | 4.61 x 10 <sup>-8</sup> |
| rs6664097  | 1   | 21834693                        | <i>ALPL</i> | 5' near gene                           | C, A                 | 0.22                   | -0.15     | 0.03           | 6.47 x 10 <sup>-6</sup> |
| rs6703976  | 1   | 21836934                        | <i>ALPL</i> | intron                                 | C, T                 | 0.10                   | -0.21     | 0.05           | 2.23 x 10 <sup>-6</sup> |
| rs869180   | 1   | 21839730                        | <i>ALPL</i> | intron                                 | G, A                 | 0.32                   | 0.13      | 0.03           | 1.54 x 10 <sup>-5</sup> |
| rs1472563  | 1   | 21840498                        | <i>ALPL</i> | intron                                 | C, T                 | 0.43                   | -0.07     | 0.03           | 1.13 x 10 <sup>-2</sup> |
| rs12116570 | 1   | 21843256                        | <i>ALPL</i> | intron                                 | T, G                 | 0.14                   | 0.03      | 0.04           | 0.50                    |
| rs7536545  | 1   | 21844822                        | <i>ALPL</i> | intron                                 | C, T                 | 0.38                   | 0.11      | 0.03           | 1.77 x 10 <sup>-4</sup> |
| rs12145027 | 1   | 21847548                        | <i>ALPL</i> | intron                                 | T, C                 | 0.24                   | 0.18      | 0.03           | 4.67 x 10 <sup>-8</sup> |
| rs9628653  | 1   | 21848962                        | <i>ALPL</i> | intron                                 | T, A                 | 0.23                   | 0.15      | 0.03           | 8.84 x 10 <sup>-6</sup> |
| rs1890431  | 1   | 21852078                        | <i>ALPL</i> | intron                                 | C, T                 | 0.45                   | 0.07      | 0.03           | 1.11 x 10 <sup>-2</sup> |
| rs1256348  | 1   | 21859210                        | <i>ALPL</i> | intron                                 | C, T                 | 0.10                   | -0.14     | 0.05           | 3.54 x 10 <sup>-3</sup> |
| rs1780315  | 1   | 21863956                        | <i>ALPL</i> | intron                                 | T, C                 | 0.29                   | -0.14     | 0.03           | 1.63 x 10 <sup>-6</sup> |
| rs10917006 | 1   | 21864206                        | <i>ALPL</i> | intron                                 | C, T                 | 0.09                   | -0.14     | 0.05           | 4.89 x 10 <sup>-3</sup> |
| rs1256341  | 1   | 21866829                        | <i>ALPL</i> | intron                                 | T, C                 | 0.27                   | 0.16      | 0.03           | 1.09 x 10 <sup>-6</sup> |
| rs12566520 | 1   | 21874187                        | <i>ALPL</i> | intron                                 | G, A                 | 0.15                   | 0.02      | 0.04           | 0.67                    |
| rs6658127  | 1   | 21875390                        | <i>ALPL</i> | intron                                 | G, A                 | 0.32                   | 0.07      | 0.03           | 2.01 x 10 <sup>-2</sup> |
| rs1256342  | 1   | 21876492                        | <i>ALPL</i> | intron                                 | C, T                 | 0.15                   | -0.17     | 0.04           | 1.89 x 10 <sup>-5</sup> |
| rs4654757  | 1   | 21884318                        | <i>ALPL</i> | intron                                 | A, G                 | 0.22                   | -0.02     | 0.03           | 0.46                    |
| rs1780326  | 1   | 21885121                        | <i>ALPL</i> | intron                                 | G, T                 | 0.35                   | 0.02      | 0.03           | 0.45                    |
| rs2071424  | 1   | 21886819                        | <i>ALPL</i> | intron                                 | C, T                 | 0.37                   | 0.07      | 0.03           | 1.07 x 10 <sup>-2</sup> |
| rs3767154  | 1   | 21889016                        | <i>ALPL</i> | intron                                 | T, C                 | 0.16                   | 0.03      | 0.04           | 0.37                    |
| rs3767153  | 1   | 21889215                        | <i>ALPL</i> | intron                                 | C, A                 | 0.36                   | 0.07      | 0.03           | 1.37 x 10 <sup>-2</sup> |
| rs1767429  | 1   | 21889340                        | <i>ALPL</i> | intron                                 | A, G                 | 0.44                   | 0.00      | 0.03           | 0.96                    |

## ONLINE SUPPORTING MATERIAL

|            |    |          |             |                                         |      |      |       |      |                        |
|------------|----|----------|-------------|-----------------------------------------|------|------|-------|------|------------------------|
| rs3767152  | 1  | 21889381 | <i>ALPL</i> | intron                                  | G, A | 0.04 | 0.05  | 0.07 | 0.54                   |
| rs1256336  | 1  | 21889506 | <i>ALPL</i> | intron                                  | C, T | 0.22 | 0.04  | 0.03 | 0.30                   |
| rs1256335  | 1  | 21890386 | <i>ALPL</i> | intron                                  | A, G | 0.22 | -0.24 | 0.03 | $7.39 \times 10^{-13}$ |
| rs3767151  | 1  | 21894104 | <i>ALPL</i> | intron                                  | C, T | 0.13 | -0.08 | 0.04 | 0.06                   |
| rs1256331  | 1  | 21895008 | <i>ALPL</i> | intron                                  | C, T | 0.23 | 0.16  | 0.03 | $3.47 \times 10^{-7}$  |
| rs1780318  | 1  | 21895625 | <i>ALPL</i> | intron                                  | T, A | 0.06 | -0.29 | 0.06 | $2.22 \times 10^{-7}$  |
| rs1256328  | 1  | 21896767 | <i>ALPL</i> | intron                                  | C, T | 0.15 | -0.12 | 0.04 | $3.04 \times 10^{-3}$  |
| rs1780320  | 1  | 21899491 | <i>ALPL</i> | intron                                  | G, A | 0.28 | 0.11  | 0.03 | $3.79 \times 10^{-4}$  |
| rs2275370  | 1  | 21900420 | <i>ALPL</i> | intron                                  | G, A | 0.21 | -0.21 | 0.03 | $1.17 \times 10^{-9}$  |
| rs1536934  | 1  | 21901277 | <i>ALPL</i> | intron                                  | G, A | 0.11 | -0.06 | 0.04 | 0.16                   |
| rs3767142  | 1  | 21901558 | <i>ALPL</i> | intron                                  | G, A | 0.28 | 0.07  | 0.03 | $1.85 \times 10^{-2}$  |
| rs1780329  | 1  | 21902950 | <i>ALPL</i> | intron                                  | C, A | 0.19 | -0.16 | 0.03 | $2.89 \times 10^{-6}$  |
| rs1772719  | 1  | 21904374 | <i>ALPL</i> | 3' UTR                                  | A, C | 0.23 | -0.22 | 0.03 | $4.70 \times 10^{-12}$ |
| rs2242421  | 1  | 21904574 | <i>ALPL</i> | 3' UTR                                  | A, G | 0.08 | -0.01 | 0.05 | 0.91                   |
| rs1772720  | 1  | 21905007 | <i>ALPL</i> | 3' near gene                            | G, A | 0.07 | -0.29 | 0.05 | $2.66 \times 10^{-8}$  |
| rs3121206  | 1  | 21907604 | <i>ALPL</i> | 3' near gene                            | A, G | 0.18 | 0.06  | 0.04 | 0.08                   |
| rs2325751  | 17 | 46017801 | <i>PNPO</i> | 5' near gene                            | T, G | 0.42 | -0.03 | 0.03 | 0.25                   |
| rs16949651 | 17 | 46019601 | <i>PNPO</i> | intron                                  | A, G | 0.12 | -0.04 | 0.04 | 0.34                   |
| rs11079804 | 17 | 46020698 | <i>PNPO</i> | exon2                                   | C, T | 0.18 | 0.00  | 0.04 | 0.99                   |
| rs2325750  | 17 | 46022330 | <i>PNPO</i> | intron                                  | A, G | 0.32 | 0.01  | 0.03 | 0.77                   |
| rs2002136  | 17 | 46022889 | <i>PNPO</i> | intron                                  | C, T | 0.35 | -0.01 | 0.03 | 0.80                   |
| rs16949676 | 17 | 46024500 | <i>PNPO</i> | 3' UTR                                  | G, C | 0.07 | -0.03 | 0.06 | 0.57                   |
| rs1986694  | 17 | 46026031 | <i>PNPO</i> | 3' UTR                                  | G, C | 0.11 | -0.06 | 0.05 | 0.21                   |
| rs1986693  | 17 | 46026156 | <i>PNPO</i> | 3' UTR                                  | G, A | 0.22 | 0.03  | 0.03 | 0.46                   |
| rs4794318  | 17 | 46028071 | <i>PNPO</i> | 3' near gene                            | G, A | 0.15 | 0.00  | 0.04 | 0.91                   |
| rs11651753 | 17 | 46029089 | <i>PNPO</i> | 3' near gene                            | C, T | 0.44 | -0.01 | 0.03 | 0.87                   |
| rs3096     | 17 | 46029432 | <i>PNPO</i> | 3' near gene (3' UTR of <i>PRR15L</i> ) | T, G | 0.33 | -0.01 | 0.03 | 0.74                   |
| rs2838356  | 21 | 45147282 | <i>PDXK</i> | intron                                  | A, G | 0.09 | -0.03 | 0.05 | 0.52                   |
| rs6518318  | 21 | 45149133 | <i>PDXK</i> | intron                                  | C, T | 0.38 | -0.02 | 0.03 | 0.57                   |
| rs2838357  | 21 | 45149518 | <i>PDXK</i> | intron                                  | A, G | 0.12 | 0.01  | 0.04 | 0.83                   |

## ONLINE SUPPORTING MATERIAL

|            |    |          |             |        |      |      |       |      |                         |
|------------|----|----------|-------------|--------|------|------|-------|------|-------------------------|
| rs766242   | 21 | 45151472 | <i>PDXK</i> | intron | C, T | 0.14 | -0.01 | 0.04 | 0.77                    |
| rs9974754  | 21 | 45151874 | <i>PDXK</i> | intron | G, A | 0.31 | -0.05 | 0.03 | 0.12                    |
| rs13050307 | 21 | 45153751 | <i>PDXK</i> | intron | A, G | 0.17 | 0.12  | 0.04 | 1.86 x 10 <sup>-3</sup> |
| rs1106797  | 21 | 45170285 | <i>PDXK</i> | intron | G, A | 0.31 | 0.02  | 0.03 | 0.57                    |
| rs2006288  | 21 | 45172860 | <i>PDXK</i> | intron | G, T | 0.15 | 0.01  | 0.04 | 0.74                    |
| rs7527     | 21 | 45175958 | <i>PDXK</i> | 3' UTR | T, C | 0.45 | 0.01  | 0.03 | 0.73                    |
| rs2070535  | 21 | 45176304 | <i>PDXK</i> | 3' UTR | C, T | 0.40 | 0.00  | 0.03 | 0.99                    |
| rs3746954  | 21 | 45177255 | <i>PDXK</i> | 3' UTR | C, A | 0.19 | 0.03  | 0.04 | 0.48                    |
| rs3204323  | 21 | 45180708 | <i>PDXK</i> | 3' UTR | G, A | 0.08 | 0.00  | 0.05 | 0.99                    |
| rs762407   | 21 | 45181446 | <i>PDXK</i> | 3' UTR | G, A | 0.30 | 0.02  | 0.03 | 0.55                    |
| rs3211247  | 21 | 45181492 | <i>PDXK</i> | 3' UTR | T, C | 0.26 | -0.06 | 0.03 | 0.08                    |
| rs1299     | 21 | 45182064 | <i>PDXK</i> | 3' UTR | C, T | 0.23 | 0.05  | 0.03 | 0.13                    |
| rs6000855  | 22 | 38061450 | <i>PDXP</i> | intron | G, C | 0.43 | 0.01  | 0.03 | 0.87                    |

<sup>1</sup>*ALPL*, tissue non-specific alkaline phosphatase; Chr, chromosome number; *NBPF3*, neuroblastoma breakpoint family, member 3; *PDXK*, pyridoxal kinase; *PDXP*, pyridoxal phosphatase; PLP, pyridoxal 5'-phosphate; *PNPO*, pyridoxamine 5'-phosphate oxidase; *PRR15L*, proline rich 15-like; SNP, single nucleotide polymorphism; UTR, untranslated region.

<sup>2</sup>Based on National Center for Biotechnology Information – Genome Reference Consortium Human genome build 37/human genome 19 assembly.

<sup>3</sup>Linear regression model adjusted for amount of vitamin B-6 intake from fortified foods/supplements, sex, body mass index, serum cotinine, and alcohol intake; outcome variable was inverse normal rank transformation of plasma PLP concentration.

**ONLINE SUPPORTING MATERIAL**

**SUPPLEMENTAL TABLE 3** Tests for associations between SNPs in vitamin B-6 metabolism genes and plasma PL and PA concentrations in healthy Irish adults<sup>1</sup>

| SNP        | Gene        | PL        |                |                       | PA        |                |                       |
|------------|-------------|-----------|----------------|-----------------------|-----------|----------------|-----------------------|
|            |             | $\beta^2$ | Standard error | <i>P</i>              | $\beta^2$ | Standard error | <i>P</i>              |
| rs4654748  | <i>ALPL</i> | 0.01      | 0.03           | 0.67                  | 0.00      | 0.03           | 0.96                  |
| rs6664097  | <i>ALPL</i> | -0.02     | 0.03           | 0.56                  | -0.05     | 0.03           | 0.12                  |
| rs6703976  | <i>ALPL</i> | -0.10     | 0.05           | $2.87 \times 10^{-2}$ | -0.08     | 0.05           | 0.09                  |
| rs869180   | <i>ALPL</i> | 0.02      | 0.03           | 0.51                  | 0.02      | 0.03           | 0.46                  |
| rs1472563  | <i>ALPL</i> | -0.05     | 0.03           | 0.06                  | -0.05     | 0.03           | 0.08                  |
| rs12116570 | <i>ALPL</i> | 0.04      | 0.04           | 0.32                  | 0.06      | 0.04           | 0.14                  |
| rs7536545  | <i>ALPL</i> | 0.06      | 0.03           | 0.05                  | 0.04      | 0.03           | 0.19                  |
| rs12145027 | <i>ALPL</i> | 0.08      | 0.03           | $1.17 \times 10^{-2}$ | 0.07      | 0.03           | 0.05                  |
| rs9628653  | <i>ALPL</i> | 0.07      | 0.03           | $2.76 \times 10^{-2}$ | 0.05      | 0.03           | 0.11                  |
| rs1890431  | <i>ALPL</i> | 0.04      | 0.03           | 0.21                  | 0.05      | 0.03           | 0.08                  |
| rs1256348  | <i>ALPL</i> | -0.03     | 0.05           | 0.52                  | -0.01     | 0.05           | 0.87                  |
| rs1780315  | <i>ALPL</i> | -0.04     | 0.03           | 0.22                  | -0.03     | 0.03           | 0.27                  |
| rs10917006 | <i>ALPL</i> | -0.02     | 0.05           | 0.64                  | -0.13     | 0.05           | $1.00 \times 10^{-2}$ |
| rs1256341  | <i>ALPL</i> | 0.06      | 0.03           | 0.08                  | 0.01      | 0.03           | 0.69                  |
| rs12566520 | <i>ALPL</i> | -0.03     | 0.04           | 0.44                  | 0.01      | 0.04           | 0.85                  |
| rs6658127  | <i>ALPL</i> | 0.04      | 0.03           | 0.19                  | 0.03      | 0.03           | 0.28                  |
| rs1256342  | <i>ALPL</i> | -0.07     | 0.04           | 0.10                  | -0.07     | 0.04           | 0.08                  |
| rs4654757  | <i>ALPL</i> | -0.05     | 0.03           | 0.18                  | -0.02     | 0.03           | 0.64                  |
| rs1780326  | <i>ALPL</i> | 0.01      | 0.03           | 0.68                  | -0.01     | 0.03           | 0.66                  |
| rs2071424  | <i>ALPL</i> | 0.02      | 0.03           | 0.54                  | 0.03      | 0.03           | 0.30                  |
| rs3767154  | <i>ALPL</i> | -0.01     | 0.04           | 0.89                  | 0.03      | 0.04           | 0.48                  |
| rs3767153  | <i>ALPL</i> | 0.02      | 0.03           | 0.61                  | 0.02      | 0.03           | 0.50                  |
| rs1767429  | <i>ALPL</i> | 0.01      | 0.03           | 0.66                  | 0.03      | 0.03           | 0.33                  |
| rs3767152  | <i>ALPL</i> | 0.10      | 0.08           | 0.17                  | 0.11      | 0.08           | 0.15                  |
| rs1256336  | <i>ALPL</i> | 0.03      | 0.04           | 0.41                  | 0.02      | 0.04           | 0.64                  |
| rs1256335  | <i>ALPL</i> | -0.07     | 0.03           | $4.25 \times 10^{-2}$ | -0.07     | 0.03           | 0.05                  |
| rs3767151  | <i>ALPL</i> | -0.08     | 0.04           | 0.06                  | -0.08     | 0.04           | 0.05                  |
| rs1256331  | <i>ALPL</i> | 0.06      | 0.03           | 0.05                  | 0.06      | 0.03           | 0.09                  |
| rs1780318  | <i>ALPL</i> | -0.02     | 0.06           | 0.74                  | 0.05      | 0.06           | 0.43                  |
| rs1256328  | <i>ALPL</i> | -0.02     | 0.04           | 0.58                  | -0.02     | 0.04           | 0.60                  |
| rs1780320  | <i>ALPL</i> | 0.03      | 0.03           | 0.29                  | 0.02      | 0.03           | 0.59                  |
| rs2275370  | <i>ALPL</i> | -0.03     | 0.03           | 0.38                  | -0.01     | 0.03           | 0.83                  |
| rs1536934  | <i>ALPL</i> | -0.09     | 0.04           | 0.05                  | -0.08     | 0.05           | 0.09                  |
| rs3767142  | <i>ALPL</i> | 0.00      | 0.03           | 0.91                  | 0.00      | 0.03           | 0.99                  |
| rs1780329  | <i>ALPL</i> | -0.07     | 0.04           | $3.70 \times 10^{-2}$ | -0.04     | 0.04           | 0.21                  |
| rs1772719  | <i>ALPL</i> | -0.06     | 0.03           | 0.08                  | -0.03     | 0.03           | 0.41                  |

## ONLINE SUPPORTING MATERIAL

|            |             |       |      |      |       |      |      |
|------------|-------------|-------|------|------|-------|------|------|
| rs2242421  | <i>ALPL</i> | -0.07 | 0.05 | 0.18 | -0.07 | 0.05 | 0.20 |
| rs1772720  | <i>ALPL</i> | -0.06 | 0.05 | 0.28 | -0.02 | 0.05 | 0.73 |
| rs3121206  | <i>ALPL</i> | 0.06  | 0.04 | 0.12 | 0.03  | 0.04 | 0.35 |
| rs2325751  | <i>PNPO</i> | -0.05 | 0.03 | 0.11 | -0.01 | 0.03 | 0.72 |
| rs16949651 | <i>PNPO</i> | -0.07 | 0.04 | 0.10 | -0.06 | 0.04 | 0.14 |
| rs11079804 | <i>PNPO</i> | -0.01 | 0.04 | 0.81 | -0.04 | 0.04 | 0.35 |
| rs2325750  | <i>PNPO</i> | 0.02  | 0.03 | 0.55 | 0.01  | 0.03 | 0.86 |
| rs2002136  | <i>PNPO</i> | -0.01 | 0.03 | 0.80 | 0.01  | 0.03 | 0.72 |
| rs16949676 | <i>PNPO</i> | -0.06 | 0.06 | 0.25 | -0.05 | 0.06 | 0.41 |
| rs1986694  | <i>PNPO</i> | -0.08 | 0.05 | 0.07 | -0.05 | 0.05 | 0.25 |
| rs1986693  | <i>PNPO</i> | 0.05  | 0.03 | 0.11 | 0.03  | 0.03 | 0.31 |
| rs4794318  | <i>PNPO</i> | 0.01  | 0.04 | 0.86 | 0.02  | 0.04 | 0.58 |
| rs11651753 | <i>PNPO</i> | -0.03 | 0.03 | 0.24 | -0.03 | 0.03 | 0.25 |
| rs3096     | <i>PNPO</i> | -0.02 | 0.03 | 0.44 | -0.02 | 0.03 | 0.44 |
| rs2838356  | <i>PDXK</i> | -0.03 | 0.05 | 0.60 | -0.04 | 0.05 | 0.43 |
| rs6518318  | <i>PDXK</i> | -0.03 | 0.03 | 0.24 | -0.02 | 0.03 | 0.57 |
| rs2838357  | <i>PDXK</i> | 0.01  | 0.04 | 0.90 | -0.01 | 0.04 | 0.91 |
| rs766242   | <i>PDXK</i> | 0.00  | 0.04 | 0.95 | -0.01 | 0.04 | 0.88 |
| rs9974754  | <i>PDXK</i> | -0.01 | 0.03 | 0.88 | -0.02 | 0.03 | 0.52 |
| rs13050307 | <i>PDXK</i> | 0.07  | 0.04 | 0.07 | 0.07  | 0.04 | 0.08 |
| rs1106797  | <i>PDXK</i> | 0.01  | 0.03 | 0.84 | 0.01  | 0.03 | 0.78 |
| rs2006288  | <i>PDXK</i> | 0.00  | 0.04 | 0.95 | -0.01 | 0.04 | 0.89 |
| rs7527     | <i>PDXK</i> | -0.01 | 0.03 | 0.73 | -0.00 | 0.03 | 0.95 |
| rs2070535  | <i>PDXK</i> | 0.00  | 0.03 | 0.91 | 0.01  | 0.03 | 0.83 |
| rs3746954  | <i>PDXK</i> | 0.01  | 0.04 | 0.71 | 0.03  | 0.04 | 0.47 |
| rs3204323  | <i>PDXK</i> | 0.04  | 0.05 | 0.48 | -0.01 | 0.05 | 0.88 |
| rs762407   | <i>PDXK</i> | 0.01  | 0.03 | 0.79 | 0.01  | 0.03 | 0.68 |
| rs3211247  | <i>PDXK</i> | -0.03 | 0.03 | 0.37 | -0.04 | 0.03 | 0.22 |
| rs1299     | <i>PDXK</i> | 0.03  | 0.03 | 0.41 | 0.05  | 0.03 | 0.15 |
| rs6000855  | <i>PDXP</i> | 0.02  | 0.03 | 0.45 | 0.02  | 0.03 | 0.57 |

<sup>1</sup>*ALPL*, tissue non-specific alkaline phosphatase; *PA*, 4-pyridoxic acid; *PDXK*, pyridoxal kinase; *PDXP*, pyridoxal phosphatase; *PL*, pyridoxal; *PNPO*, pyridoxamine 5'-phosphate oxidase; *SNP*, single nucleotide polymorphism.

<sup>2</sup>Linear regression model adjusted for amount of vitamin B-6 intake from fortified foods/supplements, sex, body mass index, serum cotinine, and alcohol intake; outcome variables were inverse normal rank transformation of plasma *PL* and *PA* concentrations.

## ONLINE SUPPORTING MATERIAL

**SUPPLEMENTAL TABLE 4** Genomic control (lambda) results for plasma pyridoxal 5'-phosphate GWAS after adjustment for age, sex and vitamin B-6 intake from fortified foods/supplements in a study population of healthy Irish adults<sup>1</sup>

| <b>B-6 vitamer</b>     | <b>Transformation of plasma B-6 vitamer concentration</b> | <b>Lambda = Median(of T<sup>2</sup>)/0.456</b> | <b>Number of markers with (-logPvalue) &gt; 7</b> |
|------------------------|-----------------------------------------------------------|------------------------------------------------|---------------------------------------------------|
| pyridoxal 5'-phosphate | none                                                      | 1.012                                          | 8                                                 |
|                        | log <sub>10</sub> transformation                          | 1.008                                          | 12                                                |
| pyridoxal              | none                                                      | 1.055                                          | 67                                                |
|                        | log <sub>10</sub> transformation                          | 1.004                                          | 0                                                 |
| 4-pyridoxic acid       | none                                                      | 1.055                                          | 66                                                |
|                        | log <sub>10</sub> transformation                          | 1.006                                          | 0                                                 |

<sup>1</sup>Lambda is defined as the median of the observed chi-squared test statistic (T<sup>2</sup>) divided by 0.456. The ideal range of lambda is from approximately 0.95 to 1.10. GWAS, genome-wide association study.

**ONLINE SUPPORTING MATERIAL**

**SUPPLEMENTAL TABLE 5** GWAS results based on data from healthy Irish adults for 10 SNPs that had failed genotyping assays on the MALDI-TOF mass spectrometer<sup>1</sup>

| SNP                    | Chr | Base pair position <sup>2</sup> | Gene        | Gene region  | Major, minor alleles | Minor allele frequency | B-6 vitamer outcome variable <sup>3</sup> | $\beta^4$ | Standard error | <i>P</i>                |
|------------------------|-----|---------------------------------|-------------|--------------|----------------------|------------------------|-------------------------------------------|-----------|----------------|-------------------------|
| rs4021228              | 1   | 21863691                        | <i>ALPL</i> | intron       | G, T                 | 0.47                   | PLP                                       | 0.04      | 0.01           | 4.25 x 10 <sup>-9</sup> |
|                        |     |                                 |             |              |                      |                        | PL                                        | 0.02      | 0.01           | 0.04                    |
|                        |     |                                 |             |              |                      |                        | PA                                        | 0.01      | 0.01           | 0.17                    |
| rs1256342 <sup>5</sup> | 1   | 21876492                        | <i>ALPL</i> | intron       | G, A                 | 0.14                   | PLP                                       | -0.04     | 0.01           | 2.66 x 10 <sup>-5</sup> |
|                        |     |                                 |             |              |                      |                        | PL                                        | -0.03     | 0.01           | 0.04                    |
|                        |     |                                 |             |              |                      |                        | PA                                        | -0.02     | 0.01           | 0.14                    |
| rs885813 <sup>6</sup>  | 1   | 21877074                        | <i>ALPL</i> | intron       | C, T                 | 0.39                   | PLP                                       | 0.01      | 0.01           | 0.41                    |
|                        |     |                                 |             |              |                      |                        | PL                                        | -0.01     | 0.01           | 0.58                    |
|                        |     |                                 |             |              |                      |                        | PA                                        | -0.01     | 0.01           | 0.56                    |
| rs1256336 <sup>7</sup> | 1   | 21889506                        | <i>ALPL</i> | intron       | C, T                 | 0.23                   | PLP                                       | 0.00      | 0.01           | 0.78                    |
|                        |     |                                 |             |              |                      |                        | PL                                        | 0.00      | 0.01           | 0.96                    |
|                        |     |                                 |             |              |                      |                        | PA                                        | 0.00      | 0.01           | 0.70                    |
| rs1697406              | 1   | 21904267                        | <i>ALPL</i> | 3' UTR       | G, A                 | 0.09                   | PLP                                       | 0.02      | 0.01           | 0.11                    |
|                        |     |                                 |             |              |                      |                        | PL                                        | 0.00      | 0.02           | 0.77                    |
|                        |     |                                 |             |              |                      |                        | PA                                        | 0.00      | 0.02           | 0.93                    |
| rs1107204              | 21  | 45138118                        | <i>PDXK</i> | 5' near gene | C, A                 | 0.43                   | PLP                                       | -0.01     | 0.01           | 0.34                    |
|                        |     |                                 |             |              |                      |                        | PL                                        | -0.01     | 0.01           | 0.49                    |
|                        |     |                                 |             |              |                      |                        | PA                                        | 0.00      | 0.01           | 0.78                    |



## ONLINE SUPPORTING MATERIAL

|                        |    |          |             |              |      |      |     |       |      |      |
|------------------------|----|----------|-------------|--------------|------|------|-----|-------|------|------|
| rs2838358 <sup>8</sup> | 21 | 45151046 | <i>PDXK</i> | intron       | T, C | 0.35 | PLP | 0.00  | 0.01 | 0.76 |
|                        |    |          |             |              |      |      | PL  | 0.00  | 0.01 | 0.71 |
|                        |    |          |             |              |      |      | PA  | 0.00  | 0.01 | 0.87 |
| rs749326               | 22 | 38051019 | <i>PDXP</i> | 5' near gene | C, T | 0.11 | PLP | 0.01  | 0.01 | 0.49 |
|                        |    |          |             |              |      |      | PL  | 0.01  | 0.01 | 0.31 |
|                        |    |          |             |              |      |      | PA  | 0.03  | 0.02 | 0.04 |
| rs9622677              | 22 | 38054262 | <i>PDXP</i> | 5' near gene | A, C | 0.42 | PLP | 0.00  | 0.01 | 0.73 |
|                        |    |          |             |              |      |      | PL  | -0.01 | 0.01 | 0.54 |
|                        |    |          |             |              |      |      | PA  | 0.00  | 0.01 | 0.87 |
| rs713835               | 22 | 38064650 | <i>PDXP</i> | 3' near gene | C, T | 0.33 | PLP | -0.01 | 0.01 | 0.49 |
|                        |    |          |             |              |      |      | PL  | -0.01 | 0.01 | 0.37 |
|                        |    |          |             |              |      |      | PA  | -0.01 | 0.01 | 0.26 |

<sup>1</sup>*n* = 2158 subjects. *ALPL*, tissue non-specific alkaline phosphatase; Chr, chromosome number; GWAS, genome-wide association study; MALDI-TOF, Matrix-Assisted Laser Desorption/Ionization – Time-of-Flight; PA, 4-pyridoxic acid; *PDXK*, pyridoxal (pyridoxine, vitamin B-6) kinase; *PDXP*, pyridoxal (pyridoxine, vitamin B-6) phosphatase; PL, pyridoxal; PLP, pyridoxal 5'-phosphate; SNP, single nucleotide polymorphism; UTR, untranslated region.

<sup>2</sup>Based on National Center for Biotechnology Information – Genome Reference Consortium Human genome build 37/human genome 19 assembly.

<sup>3</sup>Outcome variable in linear regression model was  $\log_{10}$  transformation of plasma PLP, PL, or PA concentration, as indicated.

<sup>4</sup>Linear regression model was adjusted for age and sex.

<sup>5</sup>Nearby rs4385672 (base pair position 21872404 on chromosome 1) that failed genotyping on the MALDI-TOF mass spectrometer;  $r^2 = 0.52$  for linkage disequilibrium between rs4385672 and rs1256342.

<sup>6</sup>Nearby rs12141569 (base pair position 21873002 on chromosome 1) that failed genotyping on the MALDI-TOF mass spectrometer;  $r^2 = 0.82$  for linkage disequilibrium between rs12141569 and rs885813.

<sup>7</sup>Nearby rs1256323 (base pair position 21851312 on chromosome 1) that failed genotyping on the MALDI-TOF mass spectrometer;  $r^2 = 0.62$  for linkage disequilibrium between rs1256323 and rs1256336.

## ONLINE SUPPORTING MATERIAL

<sup>8</sup>Nearby rs2838355 (base pair position 45144013 on chromosome 21) that failed genotyping on the MALDI-TOF mass spectrometer;  $r^2 = 0.93$  for linkage disequilibrium between rs2838355 and rs2838358.

## ONLINE SUPPORTING MATERIAL

**SUPPLEMENTAL TABLE 6** Gene-based analysis of association between plasma B-6 vitamer concentrations and SNPs in vitamin B-6 inter-conversion enzyme genes in healthy Irish adults<sup>1,2</sup>

| B-6 vitamer | Method used to estimate genetic variant function <sup>3</sup> | Genes tested for association with plasma B-6 vitamer concentrations |                          |                          |
|-------------|---------------------------------------------------------------|---------------------------------------------------------------------|--------------------------|--------------------------|
|             |                                                               | <i>ALPL</i> <sup>4</sup>                                            | <i>PDXK</i> <sup>5</sup> | <i>PNPO</i> <sup>6</sup> |
| PLP         | β-spline                                                      | 4.04 x 10 <sup>-15</sup>                                            | 0.23                     | 0.99                     |
|             | Fourier spline                                                | 5.87 x 10 <sup>-15</sup>                                            | 0.35                     | 0.94                     |
| PL          | β-spline                                                      | 0.03                                                                | 0.77                     | 0.52                     |
|             | Fourier spline                                                | 0.27                                                                | 0.63                     | 0.26                     |
| PA          | β-spline                                                      | 0.34                                                                | 0.92                     | 0.96                     |
|             | Fourier spline                                                | 0.67                                                                | 0.98                     | 0.88                     |

<sup>1</sup>*ALPL*, tissue non-specific alkaline phosphatase; PA, 4-pyridoxic acid; *PDXK*, pyridoxal (pyridoxine, vitamin B-6) kinase; PL, pyridoxal; PLP, pyridoxal 5'-phosphate; *PNPO*, pyridoxamine 5'-phosphate oxidase; SNP, single nucleotide polymorphism.

<sup>2</sup>*n* = 2345 subjects.

<sup>3</sup>In gene-based analyses, we treated a person's genetic data as a stochastic function and used the observed genotype data and functional data analysis techniques in the form of β-spline or Fourier spline basis functions to estimate a genetic variant function. We used the estimated genetic variant function in functional linear model regression analyses to test for association between the genetic variants and the inverse normal rank transformation of B-6 vitamer concentrations. We applied *F*-distributed test statistics to the functional linear models to determine statistical significance of the association tests.

<sup>4</sup>39 SNPs in or near the *ALPL* gene were used in gene-based analyses. Values are *P* values from applying *F*-distributed test statistics to functional linear model regression analysis.

<sup>5</sup>15 SNPs in or near the *PDXK* gene were used in gene-based analysis. Values are *P* values from applying *F*-distributed test statistics to functional linear model regression analysis.

<sup>6</sup>11 SNPs in or near the *PNPO* gene were used in gene-based analysis. Values are *P* values from applying *F*-distributed test statistics to functional linear model regression analysis.

## ONLINE SUPPORTING MATERIAL

**SUPPLEMENTAL TABLE 7** Potential regulatory regions in or near the *ALPL* gene that overlap the base pair positions of *ALPL* SNPs associated with plasma pyridoxal 5'-phosphate concentration in healthy Irish adults<sup>1</sup>

| SNP        | Open chromatin | Region of histone modification by methylation or acetylation | Transcription factor binding sites | Regions of RNA polymerase II-bound chromatin interactions | Binding site for RNA-binding protein |
|------------|----------------|--------------------------------------------------------------|------------------------------------|-----------------------------------------------------------|--------------------------------------|
| rs4654748  |                |                                                              |                                    |                                                           | √                                    |
| rs6664097  | √              | √                                                            | √                                  |                                                           |                                      |
| rs6703976  |                |                                                              |                                    |                                                           | √                                    |
| rs869180   |                |                                                              |                                    |                                                           | √                                    |
| rs7536545  |                |                                                              |                                    |                                                           | √                                    |
| rs12145027 |                |                                                              |                                    |                                                           | √                                    |
| rs9628653  |                |                                                              |                                    | √                                                         | √                                    |
| rs1780315  |                |                                                              |                                    |                                                           | √                                    |
| rs1256341  |                |                                                              |                                    |                                                           | √                                    |
| rs1256342  | √              | √                                                            | √                                  | √                                                         | √                                    |
| rs1256335  |                |                                                              |                                    |                                                           | √                                    |
| rs1256331  | √              | √                                                            | √                                  |                                                           | √                                    |
| rs1780318  | √              | √                                                            | √                                  |                                                           | √                                    |
| rs2275370  | √              | √                                                            | √                                  | √                                                         | √                                    |
| rs1780329  |                |                                                              |                                    |                                                           | √                                    |
| rs1772719  | √              | √                                                            |                                    | √                                                         | √                                    |
| rs1772720  |                |                                                              |                                    | √                                                         |                                      |
| rs1780324  |                |                                                              |                                    |                                                           |                                      |
| rs1697421  |                |                                                              |                                    |                                                           |                                      |
| rs1780321  |                |                                                              |                                    |                                                           |                                      |
| rs4021228  |                |                                                              |                                    |                                                           | √                                    |
| rs1780316  |                |                                                              |                                    |                                                           |                                      |

<sup>1</sup>*ALPL*, tissue non-specific alkaline phosphatase; SNP, single nucleotide polymorphism.

## ONLINE SUPPORTING MATERIAL

**SUPPLEMENTAL TABLE 8** Regions of open chromatin that coincide with base pair positions of SNPs associated with plasma pyridoxal 5'-phosphate concentration in healthy Irish adults<sup>1</sup>

| SNP       | Open chromatin location <sup>2</sup> | Cell line           | Cell type                               | Data source            |
|-----------|--------------------------------------|---------------------|-----------------------------------------|------------------------|
| rs1772719 | chr1:21904340-21904686               | Cerebrum_frontal_OC | cerebrum:                               | wgEncodeOpenChromDnase |
| rs1772719 | chr1:21902824-21904681               | Chorion             | fetal membrane:chorion cells            | wgEncodeOpenChromDnase |
| rs1772719 | chr1:21904058-21904503               | Frontal_cortex_OC   | frontal cortex:                         | wgEncodeOpenChromDnase |
| rs1772719 | chr1:21903766-21904457               | GM12891             | blood:lymphoblastoid cell; B-cell       | wgEncodeOpenChromDnase |
| rs1772719 | chr1:21903667-21904507               | GM12892             | blood:lymphoblastoid cell; B-cell       | wgEncodeOpenChromDnase |
| rs1772719 | chr1:21904317-21904438               | GM13977             | blood:lymphoblastoid cell               | wgEncodeOpenChromDnase |
| rs1772719 | chr1:21903698-21904793               | H7-hESC             | embryonic stem cell:embryonic stem cell | wgEncodeOpenChromDnase |
| rs1772719 | chr1:21904194-21904407               | HSMM                | muscle:Myoblast                         | wgEncodeOpenChromDnase |
| rs1772719 | chr1:21904271-21904417               | Huh-7               | liver:                                  | wgEncodeOpenChromDnase |
| rs1772719 | chr1:21903768-21904759               | iPS                 | induced pluripotent stem cell:Stem cell | wgEncodeOpenChromDnase |
| rs1772719 | chr1:21903749-21904775               | Monocytes-CD14+     | blood:Mononuclear Cell                  | wgEncodeOpenChromDnase |
| rs1772719 | chr1:21904301-21904615               | PanIslets           | pancreas:                               | wgEncodeOpenChromDnase |
|           |                                      |                     |                                         |                        |
| rs2275370 | chr1:21900417-21901350               | 8988T               | pancreatic gland:Adenocarcinoma         | wgEncodeOpenChromDnase |
| rs2275370 | chr1:21900336-21900955               | CD20+_RO01794       | blood:B-lymphocyte                      | wgEncodeOpenChromDnase |
| rs2275370 | chr1:21900398-21901734               | Cerebellum_OC       | cerebrum:                               | wgEncodeOpenChromDnase |
| rs2275370 | chr1:21900373-21901787               | Cerebrum_frontal_OC | cerebrum:                               | wgEncodeOpenChromDnase |
| rs2275370 | chr1:21900414-21902574               | Chorion             | fetal membrane:chorion cells            | wgEncodeOpenChromDnase |
| rs2275370 | chr1:21900050-21902599               | GM12891             | blood:lymphoblastoid cell; B-cell       | wgEncodeOpenChromDnase |
| rs2275370 | chr1:21900059-21900926               | GM12892             | blood:lymphoblastoid cell; B-cell       | wgEncodeOpenChromDnase |
| rs2275370 | chr1:21900347-21900950               | GM13977             | blood:lymphoblastoid cell               | wgEncodeOpenChromDnase |
| rs2275370 | chr1:21900140-21900878               | GM19239             | blood:lymphoblastoid cell               | wgEncodeOpenChromDnase |
| rs2275370 | chr1:21900059-21902035               | H1-hESC             | embryonic stem cell:embryonic stem cell | wgEncodeOpenChromDnase |
| rs2275370 | chr1:21900092-21902232               | H7-hESC             | embryonic stem cell:embryonic stem cell | wgEncodeOpenChromDnase |
| rs2275370 | chr1:21900223-21901695               | H9ES                | embryonic stem cell:embryonic stem cell | wgEncodeOpenChromDnase |
| rs2275370 | chr1:21900033-21902286               | Heart_OC            | heart:                                  | wgEncodeOpenChromDnase |
| rs2275370 | chr1:21900401-21901012               | HEK293T             | kidney: (embryo)                        | wgEncodeOpenChromDnase |

## ONLINE SUPPORTING MATERIAL

|           |                        |                 |                                         |                        |
|-----------|------------------------|-----------------|-----------------------------------------|------------------------|
| rs2275370 | chr1:21900370-21901270 | Hela-S3         | cervix:carcinoma                        | wgEncodeOpenChromDnase |
| rs2275370 | chr1:21900273-21900959 | Hela-S3         | cervix:carcinoma                        | wgEncodeOpenChromDnase |
| rs2275370 | chr1:21900044-21901003 | Hepatocyte      | liver:Hepatocyte                        | wgEncodeOpenChromDnase |
| rs2275370 | chr1:21900297-21901597 | HSMM_emb        | muscle:Myoblast (embryo)                | wgEncodeOpenChromDnase |
| rs2275370 | chr1:21900391-21900949 | Huh-7.5         | liver:                                  | wgEncodeOpenChromDnase |
| rs2275370 | chr1:21900381-21901014 | Huh-7           | liver:                                  | wgEncodeOpenChromDnase |
| rs2275370 | chr1:21900298-21902050 | HUVEC           | blood vessel:Endothelial Cell           | wgEncodeOpenChromDnase |
| rs2275370 | chr1:21900338-21901650 | IMR90           | lung:Fibroblast (fetal)                 | wgEncodeOpenChromDnase |
| rs2275370 | chr1:21900150-21901755 | iPS             | induced pluripotent stem cell:Stem cell | wgEncodeOpenChromDnase |
| rs2275370 | chr1:21900386-21900938 | iPS_CWRU1       | induced pluripotent stem cell:Stem cell | wgEncodeOpenChromDnase |
| rs2275370 | chr1:21900137-21901180 | LNCaP           | prostate:adenocarcinoma                 | wgEncodeOpenChromDnase |
| rs2275370 | chr1:21900263-21901186 | LNCaP           | prostate:adenocarcinoma                 | wgEncodeOpenChromDnase |
| rs2275370 | chr1:21900121-21901673 | MCF-7           | breast:adenocarcinoma                   | wgEncodeOpenChromDnase |
| rs2275370 | chr1:21900373-21901114 | MCF-7           | breast:adenocarcinoma                   | wgEncodeOpenChromDnase |
| rs2275370 | chr1:21900329-21902080 | Medullo_D341    | brain:medulloblastoma                   | wgEncodeOpenChromDnase |
| rs2275370 | chr1:21900049-21900636 | Monocytes-CD14+ | blood:Mononuclear Cell                  | wgEncodeOpenChromDnase |
| rs2275370 | chr1:21900200-21901505 | SK-N-SH         | brain:Neuroblastoma                     | wgEncodeOpenChromDnase |
| rs2275370 | chr1:21900366-21901402 | Stellate        | liver:Stellate cell                     | wgEncodeOpenChromDnase |
| rs2275370 | chr1:21900117-21900983 | T-47D           | breast:Epithelial Cell                  | wgEncodeOpenChromDnase |
| rs2275370 | chr1:21900134-21900420 | Hela-S3         | cervix:carcinoma                        | wgEncodeOpenChromFaire |
| rs2275370 | chr1:21900239-21900999 | Hela-S3         | cervix:carcinoma                        | wgEncodeOpenChromFaire |
|           |                        |                 |                                         |                        |
| rs1780318 | chr1:21894983-21895843 | CD20+_RO01794   | blood:B-lymphocyte                      | wgEncodeOpenChromDnase |
| rs1780318 | chr1:21895478-21895998 | Chorion         | fetal membrane:chorion cells            | wgEncodeOpenChromDnase |
| rs1780318 | chr1:21895416-21895640 | Fibrobl_GM03348 | skin:Fibroblast                         | wgEncodeOpenChromDnase |
| rs1780318 | chr1:21894886-21895690 | Fibrobl_GM03348 | skin:Fibroblast                         | wgEncodeOpenChromDnase |
| rs1780318 | chr1:21894681-21896655 | GM12891         | blood:lymphoblastoid cell; B-cell       | wgEncodeOpenChromDnase |
| rs1780318 | chr1:21894656-21895952 | GM12892         | blood:lymphoblastoid cell; B-cell       | wgEncodeOpenChromDnase |
| rs1780318 | chr1:21895371-21895761 | GM18507         | blood:lymphoblastoid cell               | wgEncodeOpenChromDnase |
| rs1780318 | chr1:21895104-21895942 | GM19238         | blood:lymphoblastoid cell               | wgEncodeOpenChromDnase |

## ONLINE SUPPORTING MATERIAL

|           |                        |                     |                                         |                        |
|-----------|------------------------|---------------------|-----------------------------------------|------------------------|
| rs1780318 | chr1:21894529-21895880 | GM19239             | blood:lymphoblastoid cell               | wgEncodeOpenChromDnase |
| rs1780318 | chr1:21894771-21895855 | H7-hESC             | embryonic stem cell:embryonic stem cell | wgEncodeOpenChromDnase |
| rs1780318 | chr1:21895361-21895921 | Hepatocyte          | liver:Hepatocyte                        | wgEncodeOpenChromDnase |
| rs1780318 | chr1:21893533-21895786 | HSMM                | muscle:Myoblast                         | wgEncodeOpenChromDnase |
| rs1780318 | chr1:21894765-21895785 | HSMM_emb            | muscle:Myoblast (embryo)                | wgEncodeOpenChromDnase |
| rs1780318 | chr1:21895244-21895791 | HSMM_FSHD           | muscle:Myoblast                         | wgEncodeOpenChromDnase |
| rs1780318 | chr1:21895320-21895742 | HSMMtube            | muscle:Myotube                          | wgEncodeOpenChromDnase |
| rs1780318 | chr1:21894631-21895631 | HTR8svn             | blastula:Trophoblast                    | wgEncodeOpenChromDnase |
| rs1780318 | chr1:21895472-21895640 | IMR90               | lung:Fibroblast (fetal)                 | wgEncodeOpenChromDnase |
| rs1780318 | chr1:21894749-21895666 | iPS                 | induced pluripotent stem cell:Stem cell | wgEncodeOpenChromDnase |
| rs1780318 | chr1:21895460-21895693 | K562                | blood:Leukemia cell                     | wgEncodeOpenChromDnase |
| rs1780318 | chr1:21894877-21895735 | K562                | blood:Leukemia cell                     | wgEncodeOpenChromDnase |
| rs1780318 | chr1:21894364-21896457 | K562                | blood:Leukemia cell                     | wgEncodeOpenChromDnase |
| rs1780318 | chr1:21894651-21895669 | K562                | blood:Leukemia cell                     | wgEncodeOpenChromDnase |
| rs1780318 | chr1:21894347-21896629 | K562                | blood:Leukemia cell                     | wgEncodeOpenChromDnase |
| rs1780318 | chr1:21894418-21896035 | K562                | blood:Leukemia cell                     | wgEncodeOpenChromDnase |
| rs1780318 | chr1:21894553-21895826 | Monocytes-CD14+     | blood:Mononuclear Cell                  | wgEncodeOpenChromDnase |
| rs1780318 | chr1:21893907-21895640 | Myometr             | myometrium:myometrial cell              | wgEncodeOpenChromDnase |
| rs1780318 | chr1:21893640-21895673 | Osteobl             | bone:Osteoblast                         | wgEncodeOpenChromDnase |
| rs1780318 | chr1:21894716-21895683 | PanIslets           | pancreas:                               | wgEncodeOpenChromDnase |
| rs1780318 | chr1:21895474-21895711 | Psoas_muscle_OC     | psoas muscle:                           | wgEncodeOpenChromDnase |
| rs1780318 | chr1:21893965-21895749 | Stellate            | liver:Stellate cell                     | wgEncodeOpenChromDnase |
| rs1780318 | chr1:21894653-21895628 | Urothelia           | urothelium:Ureter cell                  | wgEncodeOpenChromDnase |
| rs1780318 | chr1:21893954-21895711 | Urothelia           | urothelium:Ureter cell                  | wgEncodeOpenChromDnase |
| rs1780318 | chr1:21895440-21895730 | HBVP                | blood vessel:Pericyte                   | wgEncodeUwDnase        |
|           |                        |                     |                                         |                        |
| rs1256331 | chr1:21894664-21895480 | 8988T               | pancreatic gland:Adenocarcinoma         | wgEncodeOpenChromDnase |
| rs1256331 | chr1:21894983-21895843 | CD20+_RO01794       | blood:B-lymphocyte                      | wgEncodeOpenChromDnase |
| rs1256331 | chr1:21894685-21895386 | Cerebellum_OC       | cerebrum:                               | wgEncodeOpenChromDnase |
| rs1256331 | chr1:21894782-21895325 | Cerebrum_frontal_OC | cerebrum:                               | wgEncodeOpenChromDnase |

## ONLINE SUPPORTING MATERIAL

|           |                        |                 |                                         |                        |
|-----------|------------------------|-----------------|-----------------------------------------|------------------------|
| rs1256331 | chr1:21894104-21895395 | Chorion         | fetal membrane:chorion cells            | wgEncodeOpenChromDnase |
| rs1256331 | chr1:21894886-21895690 | Fibrobl_GM03348 | skin:Fibroblast                         | wgEncodeOpenChromDnase |
| rs1256331 | chr1:21894822-21895105 | Fibrobl_GM03348 | skin:Fibroblast                         | wgEncodeOpenChromDnase |
| rs1256331 | chr1:21894927-21895158 | FibroP          | skin:Fibroblast                         | wgEncodeOpenChromDnase |
| rs1256331 | chr1:21894773-21895170 | FibroP_AG08396  | skin:Fibroblast                         | wgEncodeOpenChromDnase |
| rs1256331 | chr1:21894836-21895214 | Gliobla         | brain:Glioblastoma                      | wgEncodeOpenChromDnase |
| rs1256331 | chr1:21894681-21896655 | GM12891         | blood:lymphoblastoid cell; B-cell       | wgEncodeOpenChromDnase |
| rs1256331 | chr1:21894656-21895952 | GM12892         | blood:lymphoblastoid cell; B-cell       | wgEncodeOpenChromDnase |
| rs1256331 | chr1:21894477-21895416 | GM13976         | blood:lymphoblastoid cell               | wgEncodeOpenChromDnase |
| rs1256331 | chr1:21894741-21895476 | GM13977         | blood:lymphoblastoid cell               | wgEncodeOpenChromDnase |
| rs1256331 | chr1:21894529-21895880 | GM19239         | blood:lymphoblastoid cell               | wgEncodeOpenChromDnase |
| rs1256331 | chr1:21894967-21895585 | H1-hESC         | embryonic stem cell:embryonic stem cell | wgEncodeOpenChromDnase |
| rs1256331 | chr1:21894771-21895855 | H7-hESC         | embryonic stem cell:embryonic stem cell | wgEncodeOpenChromDnase |
| rs1256331 | chr1:21895007-21895218 | H9ES            | embryonic stem cell:embryonic stem cell | wgEncodeOpenChromDnase |
| rs1256331 | chr1:21894739-21895021 | Hepatocyte      | liver:Hepatocyte                        | wgEncodeOpenChromDnase |
| rs1256331 | chr1:21894722-21895326 | HMEC            | breast:Epithelial Cell                  | wgEncodeOpenChromDnase |
| rs1256331 | chr1:21894757-21895185 | HPDE6-E6E7      | pancreatic duct:                        | wgEncodeOpenChromDnase |
| rs1256331 | chr1:21893533-21895786 | HSMM            | muscle:Myoblast                         | wgEncodeOpenChromDnase |
| rs1256331 | chr1:21894765-21895785 | HSMM_emb        | muscle:Myoblast (embryo)                | wgEncodeOpenChromDnase |
| rs1256331 | chr1:21893568-21895213 | HSMM_FSHD       | muscle:Myoblast                         | wgEncodeOpenChromDnase |
| rs1256331 | chr1:21894631-21895631 | HTR8svn         | blastula:Trophoblast                    | wgEncodeOpenChromDnase |
| rs1256331 | chr1:21894825-21895198 | HUVEC           | blood vessel:Endothelial Cell           | wgEncodeOpenChromDnase |
| rs1256331 | chr1:21893555-21895267 | IMR90           | lung:Fibroblast (fetal)                 | wgEncodeOpenChromDnase |
| rs1256331 | chr1:21894749-21895666 | iPS             | induced pluripotent stem cell:Stem cell | wgEncodeOpenChromDnase |
| rs1256331 | chr1:21894973-21895280 | iPS_CWRU1       | induced pluripotent stem cell:Stem cell | wgEncodeOpenChromDnase |
| rs1256331 | chr1:21894833-21895489 | iPS_NiHi7       | induced pluripotent stem cell:Stem cell | wgEncodeOpenChromDnase |
| rs1256331 | chr1:21895003-21895229 | K562            | blood:Leukemia cell                     | wgEncodeOpenChromDnase |
| rs1256331 | chr1:21894877-21895735 | K562            | blood:Leukemia cell                     | wgEncodeOpenChromDnase |
| rs1256331 | chr1:21894364-21896457 | K562            | blood:Leukemia cell                     | wgEncodeOpenChromDnase |
| rs1256331 | chr1:21894961-21895568 | K562            | blood:Leukemia cell                     | wgEncodeOpenChromDnase |



## ONLINE SUPPORTING MATERIAL

|           |                        |                 |                                         |                        |
|-----------|------------------------|-----------------|-----------------------------------------|------------------------|
| rs1256331 | chr1:21894651-21895669 | K562            | blood:Leukemia cell                     | wgEncodeOpenChromDnase |
| rs1256331 | chr1:21894347-21896629 | K562            | blood:Leukemia cell                     | wgEncodeOpenChromDnase |
| rs1256331 | chr1:21894418-21896035 | K562            | blood:Leukemia cell                     | wgEncodeOpenChromDnase |
| rs1256331 | chr1:21894851-21895238 | MCF-7           | breast:adenocarcinoma                   | wgEncodeOpenChromDnase |
| rs1256331 | chr1:21894721-21895082 | MCF-7           | breast:adenocarcinoma                   | wgEncodeOpenChromDnase |
| rs1256331 | chr1:21894818-21895300 | MCF-7           | breast:adenocarcinoma                   | wgEncodeOpenChromDnase |
| rs1256331 | chr1:21894982-21895258 | Melano          | skin:Melanocyte                         | wgEncodeOpenChromDnase |
| rs1256331 | chr1:21894553-21895826 | Monocytes-CD14+ | blood:Mononuclear Cell                  | wgEncodeOpenChromDnase |
| rs1256331 | chr1:21893907-21895640 | Myometr         | myometrium:myometrial cell              | wgEncodeOpenChromDnase |
| rs1256331 | chr1:21894924-21895137 | NHEK            | skin:keratinocyte                       | wgEncodeOpenChromDnase |
| rs1256331 | chr1:21893640-21895673 | Osteobl         | bone:Osteoblast                         | wgEncodeOpenChromDnase |
| rs1256331 | chr1:21894016-21895208 | PanIsletD       | pancreas:                               | wgEncodeOpenChromDnase |
| rs1256331 | chr1:21894716-21895683 | PanIslets       | pancreas:                               | wgEncodeOpenChromDnase |
| rs1256331 | chr1:21894703-21895363 | pHTE            | trachea:Epithelial Cell                 | wgEncodeOpenChromDnase |
| rs1256331 | chr1:21894801-21895104 | ProgFib         | skin:Fibroblast                         | wgEncodeOpenChromDnase |
| rs1256331 | chr1:21894067-21895281 | Psoas_muscle_OC | psoas muscle:                           | wgEncodeOpenChromDnase |
| rs1256331 | chr1:21894788-21895162 | RWPE1           | prostate:Epithelial Cell                | wgEncodeOpenChromDnase |
| rs1256331 | chr1:21894933-21895566 | SK-N-SH         | brain:Neuroblastoma                     | wgEncodeOpenChromDnase |
| rs1256331 | chr1:21893965-21895749 | Stellate        | liver:Stellate cell                     | wgEncodeOpenChromDnase |
| rs1256331 | chr1:21894653-21895628 | Urothelia       | urothelium:Ureter cell                  | wgEncodeOpenChromDnase |
| rs1256331 | chr1:21893890-21895557 | Urothelia       | urothelium:Ureter cell                  | wgEncodeOpenChromDnase |
| rs1256331 | chr1:21893954-21895711 | Urothelia       | urothelium:Ureter cell                  | wgEncodeOpenChromDnase |
| rs1256331 | chr1:21893869-21895609 | Urothelia       | urothelium:Ureter cell                  | wgEncodeOpenChromDnase |
| rs1256331 | chr1:21894822-21895159 | HTR8svn         | blastula:Trophoblast                    | wgEncodeOpenChromFaire |
| rs1256331 | chr1:21894853-21895170 | Urothelia       | urothelium:Ureter cell                  | wgEncodeOpenChromFaire |
| rs1256331 | chr1:21894857-21895221 | Urothelia       | urothelium:Ureter cell                  | wgEncodeOpenChromFaire |
| rs1256331 | chr1:21894980-21895130 | H7-hESC         | embryonic stem cell:embryonic stem cell | wgEncodeUwDgf          |
| rs1256331 | chr1:21894920-21895070 | HA-h            | brain; hippocampus:                     | wgEncodeUwDgf          |
| rs1256331 | chr1:21894920-21895070 | HA-sp           | spinal cord:astrocyte                   | wgEncodeUwDgf          |
| rs1256331 | chr1:21894880-21895030 | HCFaa           | heart:Fibroblast                        | wgEncodeUwDgf          |

## ONLINE SUPPORTING MATERIAL

|           |                        |                   |                                 |                        |
|-----------|------------------------|-------------------|---------------------------------|------------------------|
| rs1256331 | chr1:21894920-21895070 | HEEpiC            | esophagus:Epithelial Cell       | wgEncodeUwDgf          |
| rs1256331 | chr1:21894860-21895010 | HIPEpiC           | eye:Epithelial Cell             | wgEncodeUwDgf          |
| rs1256331 | chr1:21894880-21895030 | HMVEC-LLy         | blood vessel:Endothelial Cell   | wgEncodeUwDgf          |
| rs1256331 | chr1:21894920-21895070 | HMVEC-dBI-Neo     | blood vessel:Endothelial Cell   | wgEncodeUwDgf          |
| rs1256331 | chr1:21894900-21895050 | HMVEC-dBI-Ad      | blood vessel:Endothelial Cell   | wgEncodeUwDgf          |
| rs1256331 | chr1:21894920-21895070 | HMVEC-dLy-Neo     | blood vessel:Endothelial Cell   | wgEncodeUwDgf          |
| rs1256331 | chr1:21894920-21895070 | HMVEC-LBI         | blood vessel:Endothelial Cell   | wgEncodeUwDgf          |
| rs1256331 | chr1:21894920-21895070 | HUVEC             | blood vessel:Endothelial Cell   | wgEncodeUwDgf          |
| rs1256331 | chr1:21894880-21895030 | M059J             | brain:Glioblastoma              | wgEncodeUwDgf          |
| rs1256331 | chr1:21894900-21895050 | NH-A              | brain:astrocyte                 | wgEncodeUwDgf          |
| rs1256331 | chr1:21894880-21895030 | NHLF              | lung:Fibroblast                 | wgEncodeUwDgf          |
| rs1256331 | chr1:21894940-21895090 | RPMI-7951         | skin:Melanoma                   | wgEncodeUwDgf          |
| rs1256331 | chr1:21894880-21895030 | SAEC              | small airway:Epithelial Cell    | wgEncodeUwDgf          |
| rs1256331 | chr1:21894980-21895070 | HBVSMC            | blood vessel:Smooth muscle cell | wgEncodeUwDnase        |
| rs1256331 | chr1:21894940-21895090 | HEEpiC            | esophagus:Epithelial Cell       | wgEncodeUwDnase        |
| rs1256331 | chr1:21894940-21895050 | HMVEC-dBI-Ad      | blood vessel:Endothelial Cell   | wgEncodeUwDnase        |
| rs1256331 | chr1:21894900-21895050 | HMVEC-dLy-Neo     | blood vessel:Endothelial Cell   | wgEncodeUwDnase        |
| rs1256331 | chr1:21894920-21895050 | HMVEC-LBI         | blood vessel:Endothelial Cell   | wgEncodeUwDnase        |
| rs1256331 | chr1:21894860-21895010 | HNPCEpiC          | eye:Endothelial Cell            | wgEncodeUwDnase        |
| rs1256331 | chr1:21894920-21895050 | HRE               | kidney:Epithelial Cell          | wgEncodeUwDnase        |
| rs1256331 | chr1:21894880-21895030 | M059J             | brain:Glioblastoma              | wgEncodeUwDnase        |
| rs1256331 | chr1:21894860-21895010 | bone_marrow_MSC   | bone marrow:fibroblastoid cell  | wgEncodeUwDnase        |
| rs1256331 | chr1:21894900-21895050 | NH-A              | brain:astrocyte                 | wgEncodeUwDnase        |
| rs1256331 | chr1:21894920-21895070 | NHBE_RA           | bronchial:Epithelial Cell       | wgEncodeUwDnase        |
| rs1256331 | chr1:21894900-21895050 | NHLF              | lung:Fibroblast                 | wgEncodeUwDnase        |
| rs1256331 | chr1:21894900-21895030 | PrEC              | prostate:Epithelial Cell        | wgEncodeUwDnase        |
| rs1256331 | chr1:21894960-21895070 | RPMI-7951         | skin:Melanoma                   | wgEncodeUwDnase        |
| rs1256331 | chr1:21894900-21895050 | SAEC              | small airway:Epithelial Cell    | wgEncodeUwDnase        |
|           |                        |                   |                                 |                        |
| rs6664097 | chr1:21834656-21837062 | Frontal_cortex_OC | frontal cortex:                 | wgEncodeOpenChromDnase |

## ONLINE SUPPORTING MATERIAL

|           |                        |            |                                         |                        |
|-----------|------------------------|------------|-----------------------------------------|------------------------|
| rs6664097 | chr1:21834677-21837318 | H1-hESC    | embryonic stem cell:embryonic stem cell | wgEncodeOpenChromDnase |
| rs6664097 | chr1:21834693-21836492 | Hepatocyte | liver:Hepatocyte                        | wgEncodeOpenChromDnase |
|           |                        |            |                                         |                        |
| rs1256342 | chr1:21876416-21876772 | Hepatocyte | liver:Hepatocyte                        | wgEncodeOpenChromDnase |
| rs1256342 | chr1:21876431-21876923 | K562       | blood:Leukemia cell                     | wgEncodeOpenChromDnase |
| rs1256342 | chr1:21876455-21876586 | Melano     | skin:Melanocyte                         | wgEncodeOpenChromDnase |

<sup>1</sup>SNP, single nucleotide polymorphism.

<sup>2</sup>Based on National Center for Biotechnology Information – Genome Reference Consortium Human genome build 37/human genome 19 assembly.

## ONLINE SUPPORTING MATERIAL

**SUPPLEMENTAL TABLE 9** Regions of histone modification by methylation or acetylation that coincide with base pair positions of SNPs associated with plasma pyridoxal 5'-phosphate concentration in healthy Irish adults<sup>1</sup>

| SNP       | Histone marker | Location <sup>2</sup>  | Cell line     | Cell type                               | Data source          |
|-----------|----------------|------------------------|---------------|-----------------------------------------|----------------------|
| rs1772719 | H3K4me1        | chr1:21896306-21930307 | A549          | lung:Epithelial Cell                    | wgEncodeBroadHistone |
| rs1772719 | H3K4me2        | chr1:21903411-21923201 | A549          | lung:Epithelial Cell                    | wgEncodeBroadHistone |
| rs1772719 | H4K20me1       | chr1:21889255-21956984 | A549          | lung:Epithelial Cell                    | wgEncodeBroadHistone |
| rs1772719 | H4K20me1       | chr1:21852998-22050404 | Dnd41         | blood:T-lymphocyte; Leukemia            | wgEncodeBroadHistone |
| rs1772719 | H3K36me3       | chr1:21877875-21906791 | H1-hESC       | embryonic stem cell:embryonic stem cell | wgEncodeBroadHistone |
| rs1772719 | H3K9ac         | chr1:21894277-21906732 | H1-hESC       | embryonic stem cell:embryonic stem cell | wgEncodeBroadHistone |
| rs1772719 | H4K20me1       | chr1:21828171-22115109 | H1-hESC       | embryonic stem cell:embryonic stem cell | wgEncodeBroadHistone |
| rs1772719 | H4K20me1       | chr1:21836544-23901982 | Hela-S3       | cervix:carcinoma                        | wgEncodeBroadHistone |
| rs1772719 | H4K20me1       | chr1:21881787-22003486 | HepG2         | liver:carcinoma                         | wgEncodeBroadHistone |
| rs1772719 | H3K4me1        | chr1:21891033-21924025 | HMEC          | breast:Epithelial Cell                  | wgEncodeBroadHistone |
| rs1772719 | H4K20me1       | chr1:21892330-21906656 | HMEC          | breast:Epithelial Cell                  | wgEncodeBroadHistone |
| rs1772719 | H3K36me3       | chr1:21828979-21915960 | HSMM          | muscle:Myoblast                         | wgEncodeBroadHistone |
| rs1772719 | H3K9ac         | chr1:21887245-21906254 | HSMM          | muscle:Myoblast                         | wgEncodeBroadHistone |
| rs1772719 | H3K36me3       | chr1:21880031-21907378 | HSMMtube      | muscle:Myotube                          | wgEncodeBroadHistone |
| rs1772719 | H3K4me1        | chr1:21826693-21927461 | HSMMtube      | muscle:Myotube                          | wgEncodeBroadHistone |
| rs1772719 | H4K20me1       | chr1:17184307-25646596 | K562          | blood:Leukemia cell                     | wgEncodeBroadHistone |
| rs1772719 | H3K9ac         | chr1:21904370-21904943 | CD14+_RO01746 | blood:Mononuclear Cell                  | wgEncodeBroadHistone |
| rs1772719 | H3K9ac         | chr1:21903870-21904880 | CD14+_RO01746 | blood:Mononuclear Cell                  | wgEncodeBroadHistone |
| rs1772719 | H3K9ac         | chr1:21870065-21905328 | NH-A          | brain:astrocyte                         | wgEncodeBroadHistone |
| rs1772719 | H4K20me1       | chr1:21896110-21904797 | NHDF-Ad       | bronchial:Fibroblast                    | wgEncodeBroadHistone |
| rs1772719 | H4K20me1       | chr1:21882192-22031744 | NHEK          | skin:keratinocyte                       | wgEncodeBroadHistone |
| rs1772719 | H4K20me1       | chr1:21893145-21906700 | Osteobl       | bone:Osteoblast                         | wgEncodeBroadHistone |
|           |                |                        |               |                                         |                      |
| rs2275370 | H3K4me1        | chr1:21900244-21900479 | NT2-D1        | testis:                                 | wgEncodeSydhHistone  |
| rs2275370 | H3K9acB        | chr1:21900402-21901854 | NT2-D1        | testis:                                 | wgEncodeSydhHistone  |
| rs2275370 | H3K4me1        | chr1:21896306-21930307 | A549          | lung:Epithelial Cell                    | wgEncodeBroadHistone |
| rs2275370 | H4K20me1       | chr1:21889255-21956984 | A549          | lung:Epithelial Cell                    | wgEncodeBroadHistone |
| rs2275370 | H4K20me1       | chr1:21852998-22050404 | Dnd41         | blood:T-lymphocyte; Leukemia            | wgEncodeBroadHistone |

## ONLINE SUPPORTING MATERIAL

|           |          |                        |          |                                         |                      |
|-----------|----------|------------------------|----------|-----------------------------------------|----------------------|
| rs2275370 | H4K20me1 | chr1:21890246-21904276 | GM12878  | blood:B-lymphocyte                      | wgEncodeBroadHistone |
| rs2275370 | H3K27ac  | chr1:21899990-21902326 | H1-hESC  | embryonic stem cell:embryonic stem cell | wgEncodeBroadHistone |
| rs2275370 | H3K36me3 | chr1:21877875-21906791 | H1-hESC  | embryonic stem cell:embryonic stem cell | wgEncodeBroadHistone |
| rs2275370 | H3K4me1  | chr1:21899964-21901759 | H1-hESC  | embryonic stem cell:embryonic stem cell | wgEncodeBroadHistone |
| rs2275370 | H3K4me2  | chr1:21900072-21902254 | H1-hESC  | embryonic stem cell:embryonic stem cell | wgEncodeBroadHistone |
| rs2275370 | H3K9ac   | chr1:21894277-21906732 | H1-hESC  | embryonic stem cell:embryonic stem cell | wgEncodeBroadHistone |
| rs2275370 | H4K20me1 | chr1:21828171-22115109 | H1-hESC  | embryonic stem cell:embryonic stem cell | wgEncodeBroadHistone |
| rs2275370 | H4K20me1 | chr1:21836544-23901982 | Hela-S3  | cervix:carcinoma                        | wgEncodeBroadHistone |
| rs2275370 | H4K20me1 | chr1:21900283-21900451 | Hela-S3  | cervix:carcinoma                        | wgEncodeBroadHistone |
| rs2275370 | H4K20me1 | chr1:21900319-21900551 | Hela-S3  | cervix:carcinoma                        | wgEncodeBroadHistone |
| rs2275370 | H4K20me1 | chr1:21881787-22003486 | HepG2    | liver:carcinoma                         | wgEncodeBroadHistone |
| rs2275370 | H3K4me1  | chr1:21891033-21924025 | HMEC     | breast:Epithelial Cell                  | wgEncodeBroadHistone |
| rs2275370 | H3K4me1  | chr1:21899691-21902606 | HMEC     | breast:Epithelial Cell                  | wgEncodeBroadHistone |
| rs2275370 | H4K20me1 | chr1:21892330-21906656 | HMEC     | breast:Epithelial Cell                  | wgEncodeBroadHistone |
| rs2275370 | H3K27ac  | chr1:21899152-21902681 | HSMM     | muscle:Myoblast                         | wgEncodeBroadHistone |
| rs2275370 | H3K36me3 | chr1:21828979-21915960 | HSMM     | muscle:Myoblast                         | wgEncodeBroadHistone |
| rs2275370 | H3K4me1  | chr1:21899268-21902877 | HSMM     | muscle:Myoblast                         | wgEncodeBroadHistone |
| rs2275370 | H3K4me2  | chr1:21899716-21902302 | HSMM     | muscle:Myoblast                         | wgEncodeBroadHistone |
| rs2275370 | H3K9ac   | chr1:21887245-21906254 | HSMM     | muscle:Myoblast                         | wgEncodeBroadHistone |
| rs2275370 | H3K9ac   | chr1:21899509-21902564 | HSMM     | muscle:Myoblast                         | wgEncodeBroadHistone |
| rs2275370 | H3K36me3 | chr1:21880031-21907378 | HSMMtube | muscle:Myotube                          | wgEncodeBroadHistone |
| rs2275370 | H3K4me1  | chr1:21826693-21927461 | HSMMtube | muscle:Myotube                          | wgEncodeBroadHistone |
| rs2275370 | H3K4me1  | chr1:21900142-21901971 | HSMMtube | muscle:Myotube                          | wgEncodeBroadHistone |
| rs2275370 | H3K9ac   | chr1:21899919-21902873 | HSMMtube | muscle:Myotube                          | wgEncodeBroadHistone |
| rs2275370 | H3K27ac  | chr1:21899376-21902740 | HUVEC    | blood vessel:Endothelial Cell           | wgEncodeBroadHistone |
| rs2275370 | H3K4me1  | chr1:21899278-21903118 | HUVEC    | blood vessel:Endothelial Cell           | wgEncodeBroadHistone |
| rs2275370 | H3K4me2  | chr1:21899533-21902567 | HUVEC    | blood vessel:Endothelial Cell           | wgEncodeBroadHistone |
| rs2275370 | H3K9ac   | chr1:21900095-21902426 | HUVEC    | blood vessel:Endothelial Cell           | wgEncodeBroadHistone |
| rs2275370 | H4K20me1 | chr1:21892564-21900631 | HUVEC    | blood vessel:Endothelial Cell           | wgEncodeBroadHistone |
| rs2275370 | H4K20me1 | chr1:17184307-25646596 | K562     | blood:Leukemia cell                     | wgEncodeBroadHistone |

## ONLINE SUPPORTING MATERIAL

|           |          |                        |          |                                         |                      |
|-----------|----------|------------------------|----------|-----------------------------------------|----------------------|
| rs2275370 | H3K9ac   | chr1:21870065-21905328 | NH-A     | brain:astrocyte                         | wgEncodeBroadHistone |
| rs2275370 | H3K4me1  | chr1:21900297-21902185 | NH-A     | brain:astrocyte                         | wgEncodeBroadHistone |
| rs2275370 | H3K4me1  | chr1:21900369-21901577 | NHDF-Ad  | bronchial:Fibroblast                    | wgEncodeBroadHistone |
| rs2275370 | H4K20me1 | chr1:21896110-21904797 | NHDF-Ad  | bronchial:Fibroblast                    | wgEncodeBroadHistone |
| rs2275370 | H4K20me1 | chr1:21882192-22031744 | NHEK     | skin:keratinocyte                       | wgEncodeBroadHistone |
| rs2275370 | H4K20me1 | chr1:21893145-21906700 | Osteobl  | bone:Osteoblast                         | wgEncodeBroadHistone |
| rs2275370 | H3K36me3 | chr1:21881080-21902435 | Osteobl  | bone:Osteoblast                         | wgEncodeBroadHistone |
| rs2275370 | H3K4me1  | chr1:21900227-21902018 | Osteobl  | bone:Osteoblast                         | wgEncodeBroadHistone |
|           |          |                        |          |                                         |                      |
| rs1780318 | H4K20me1 | chr1:21889255-21956984 | A549     | lung:Epithelial Cell                    | wgEncodeBroadHistone |
| rs1780318 | H4K20me1 | chr1:21852998-22050404 | Dnd41    | blood:T-lymphocyte; Leukemia            | wgEncodeBroadHistone |
| rs1780318 | H4K20me1 | chr1:21890246-21904276 | GM12878  | blood:B-lymphocyte                      | wgEncodeBroadHistone |
| rs1780318 | H3K36me3 | chr1:21877875-21906791 | H1-hESC  | embryonic stem cell:embryonic stem cell | wgEncodeBroadHistone |
| rs1780318 | H3K9ac   | chr1:21894277-21906732 | H1-hESC  | embryonic stem cell:embryonic stem cell | wgEncodeBroadHistone |
| rs1780318 | H4K20me1 | chr1:21828171-22115109 | H1-hESC  | embryonic stem cell:embryonic stem cell | wgEncodeBroadHistone |
| rs1780318 | H4K20me1 | chr1:21836544-23901982 | Hela-S3  | cervix:carcinoma                        | wgEncodeBroadHistone |
| rs1780318 | H4K20me1 | chr1:21881787-22003486 | HepG2    | liver:carcinoma                         | wgEncodeBroadHistone |
| rs1780318 | H3K4me1  | chr1:21891033-21924025 | HMEC     | breast:Epithelial Cell                  | wgEncodeBroadHistone |
| rs1780318 | H4K20me1 | chr1:21892330-21906656 | HMEC     | breast:Epithelial Cell                  | wgEncodeBroadHistone |
| rs1780318 | H3K27ac  | chr1:21890234-21897015 | HSMM     | muscle:Myoblast                         | wgEncodeBroadHistone |
| rs1780318 | H3K36me3 | chr1:21828979-21915960 | HSMM     | muscle:Myoblast                         | wgEncodeBroadHistone |
| rs1780318 | H3K4me1  | chr1:21890032-21897342 | HSMM     | muscle:Myoblast                         | wgEncodeBroadHistone |
| rs1780318 | H3K4me3  | chr1:21893070-21896375 | HSMM     | muscle:Myoblast                         | wgEncodeBroadHistone |
| rs1780318 | H3K9ac   | chr1:21887245-21906254 | HSMM     | muscle:Myoblast                         | wgEncodeBroadHistone |
| rs1780318 | H3K9ac   | chr1:21892933-21896094 | HSMM     | muscle:Myoblast                         | wgEncodeBroadHistone |
| rs1780318 | H3K27ac  | chr1:21890758-21896874 | HSMMtube | muscle:Myotube                          | wgEncodeBroadHistone |
| rs1780318 | H3K27ac  | chr1:21892734-21896390 | HSMMtube | muscle:Myotube                          | wgEncodeBroadHistone |
| rs1780318 | H3K36me3 | chr1:21880031-21907378 | HSMMtube | muscle:Myotube                          | wgEncodeBroadHistone |
| rs1780318 | H3K4me1  | chr1:21826693-21927461 | HSMMtube | muscle:Myotube                          | wgEncodeBroadHistone |
| rs1780318 | H3K4me1  | chr1:21889674-21897482 | HSMMtube | muscle:Myotube                          | wgEncodeBroadHistone |

## ONLINE SUPPORTING MATERIAL

|           |          |                        |          |                                         |                      |
|-----------|----------|------------------------|----------|-----------------------------------------|----------------------|
| rs1780318 | H3K4me2  | chr1:21890662-21896706 | HSMMtube | muscle:Myotube                          | wgEncodeBroadHistone |
| rs1780318 | H3K4me2  | chr1:21893216-21896214 | HSMMtube | muscle:Myotube                          | wgEncodeBroadHistone |
| rs1780318 | H3K4me3  | chr1:21893182-21896644 | HSMMtube | muscle:Myotube                          | wgEncodeBroadHistone |
| rs1780318 | H3K9ac   | chr1:21890216-21897448 | HSMMtube | muscle:Myotube                          | wgEncodeBroadHistone |
| rs1780318 | H4K20me1 | chr1:21892564-21900631 | HUVEC    | blood vessel:Endothelial Cell           | wgEncodeBroadHistone |
| rs1780318 | H4K20me1 | chr1:17184307-25646596 | K562     | blood:Leukemia cell                     | wgEncodeBroadHistone |
| rs1780318 | H3K4me2  | chr1:21893167-21896165 | NH-A     | brain:astrocyte                         | wgEncodeBroadHistone |
| rs1780318 | H3K9ac   | chr1:21870065-21905328 | NH-A     | brain:astrocyte                         | wgEncodeBroadHistone |
| rs1780318 | H3K9ac   | chr1:21892932-21896090 | NH-A     | brain:astrocyte                         | wgEncodeBroadHistone |
| rs1780318 | H3K27ac  | chr1:21892889-21896280 | NH-A     | brain:astrocyte                         | wgEncodeBroadHistone |
| rs1780318 | H3K4me1  | chr1:21892908-21896584 | NH-A     | brain:astrocyte                         | wgEncodeBroadHistone |
| rs1780318 | H4K20me1 | chr1:21882192-22031744 | NHEK     | skin:keratinocyte                       | wgEncodeBroadHistone |
| rs1780318 | H4K20me1 | chr1:21893145-21906700 | Osteobl  | bone:Osteoblast                         | wgEncodeBroadHistone |
| rs1780318 | H3K36me3 | chr1:21881080-21902435 | Osteobl  | bone:Osteoblast                         | wgEncodeBroadHistone |
| rs1780318 | H3K4me1  | chr1:21890276-21896926 | Osteobl  | bone:Osteoblast                         | wgEncodeBroadHistone |
| rs1780318 | H3K4me2  | chr1:21892998-21896321 | Osteobl  | bone:Osteoblast                         | wgEncodeBroadHistone |
|           |          |                        |          |                                         |                      |
| rs1256331 | H4K20me1 | chr1:21889255-21956984 | A549     | lung:Epithelial Cell                    | wgEncodeBroadHistone |
| rs1256331 | H4K20me1 | chr1:21852998-22050404 | Dnd41    | blood:T-lymphocyte; Leukemia            | wgEncodeBroadHistone |
| rs1256331 | H4K20me1 | chr1:21890246-21904276 | GM12878  | blood:B-lymphocyte                      | wgEncodeBroadHistone |
| rs1256331 | H3K36me3 | chr1:21877875-21906791 | H1-hESC  | embryonic stem cell:embryonic stem cell | wgEncodeBroadHistone |
| rs1256331 | H3K9ac   | chr1:21894277-21906732 | H1-hESC  | embryonic stem cell:embryonic stem cell | wgEncodeBroadHistone |
| rs1256331 | H4K20me1 | chr1:21828171-22115109 | H1-hESC  | embryonic stem cell:embryonic stem cell | wgEncodeBroadHistone |
| rs1256331 | H4K20me1 | chr1:21836544-23901982 | Hela-S3  | cervix:carcinoma                        | wgEncodeBroadHistone |
| rs1256331 | H4K20me1 | chr1:21881787-22003486 | HepG2    | liver:carcinoma                         | wgEncodeBroadHistone |
| rs1256331 | H3K4me1  | chr1:21891033-21924025 | HMEC     | breast:Epithelial Cell                  | wgEncodeBroadHistone |
| rs1256331 | H3K4me1  | chr1:21894797-21895405 | HMEC     | breast:Epithelial Cell                  | wgEncodeBroadHistone |
| rs1256331 | H4K20me1 | chr1:21892330-21906656 | HMEC     | breast:Epithelial Cell                  | wgEncodeBroadHistone |
| rs1256331 | H3K27ac  | chr1:21890234-21897015 | HSMM     | muscle:Myoblast                         | wgEncodeBroadHistone |
| rs1256331 | H3K36me3 | chr1:21828979-21915960 | HSMM     | muscle:Myoblast                         | wgEncodeBroadHistone |

## ONLINE SUPPORTING MATERIAL

|           |          |                        |          |                               |                      |
|-----------|----------|------------------------|----------|-------------------------------|----------------------|
| rs1256331 | H3K4me1  | chr1:21890032-21897342 | HSMM     | muscle:Myoblast               | wgEncodeBroadHistone |
| rs1256331 | H3K4me2  | chr1:21894182-21895499 | HSMM     | muscle:Myoblast               | wgEncodeBroadHistone |
| rs1256331 | H3K4me3  | chr1:21893070-21896375 | HSMM     | muscle:Myoblast               | wgEncodeBroadHistone |
| rs1256331 | H3K79me2 | chr1:21894635-21895322 | HSMM     | muscle:Myoblast               | wgEncodeBroadHistone |
| rs1256331 | H3K9ac   | chr1:21887245-21906254 | HSMM     | muscle:Myoblast               | wgEncodeBroadHistone |
| rs1256331 | H3K9ac   | chr1:21892933-21896094 | HSMM     | muscle:Myoblast               | wgEncodeBroadHistone |
| rs1256331 | H3K27ac  | chr1:21890758-21896874 | HSMMtube | muscle:Myotube                | wgEncodeBroadHistone |
| rs1256331 | H3K27ac  | chr1:21892734-21896390 | HSMMtube | muscle:Myotube                | wgEncodeBroadHistone |
| rs1256331 | H3K36me3 | chr1:21880031-21907378 | HSMMtube | muscle:Myotube                | wgEncodeBroadHistone |
| rs1256331 | H3K4me1  | chr1:21826693-21927461 | HSMMtube | muscle:Myotube                | wgEncodeBroadHistone |
| rs1256331 | H3K4me1  | chr1:21889674-21897482 | HSMMtube | muscle:Myotube                | wgEncodeBroadHistone |
| rs1256331 | H3K4me2  | chr1:21890662-21896706 | HSMMtube | muscle:Myotube                | wgEncodeBroadHistone |
| rs1256331 | H3K4me2  | chr1:21893216-21896214 | HSMMtube | muscle:Myotube                | wgEncodeBroadHistone |
| rs1256331 | H3K4me3  | chr1:21893182-21896644 | HSMMtube | muscle:Myotube                | wgEncodeBroadHistone |
| rs1256331 | H3K9ac   | chr1:21890216-21897448 | HSMMtube | muscle:Myotube                | wgEncodeBroadHistone |
| rs1256331 | H3K4me1  | chr1:21894971-21895076 | HUVEC    | blood vessel:Endothelial Cell | wgEncodeBroadHistone |
| rs1256331 | H4K20me1 | chr1:21892564-21900631 | HUVEC    | blood vessel:Endothelial Cell | wgEncodeBroadHistone |
| rs1256331 | H4K20me1 | chr1:17184307-25646596 | K562     | blood:Leukemia cell           | wgEncodeBroadHistone |
| rs1256331 | H3K4me2  | chr1:21893167-21896165 | NH-A     | brain:astrocyte               | wgEncodeBroadHistone |
| rs1256331 | H3K9ac   | chr1:21870065-21905328 | NH-A     | brain:astrocyte               | wgEncodeBroadHistone |
| rs1256331 | H3K9ac   | chr1:21892932-21896090 | NH-A     | brain:astrocyte               | wgEncodeBroadHistone |
| rs1256331 | H3K27ac  | chr1:21892889-21896280 | NH-A     | brain:astrocyte               | wgEncodeBroadHistone |
| rs1256331 | H3K4me1  | chr1:21892908-21896584 | NH-A     | brain:astrocyte               | wgEncodeBroadHistone |
| rs1256331 | H3K4me1  | chr1:21893386-21895511 | NHDF-Ad  | bronchial:Fibroblast          | wgEncodeBroadHistone |
| rs1256331 | H4K20me1 | chr1:21882192-22031744 | NHEK     | skin:keratinocyte             | wgEncodeBroadHistone |
| rs1256331 | H3K4me3  | chr1:21894408-21895295 | Osteobl  | bone:Osteoblast               | wgEncodeBroadHistone |
| rs1256331 | H4K20me1 | chr1:21893145-21906700 | Osteobl  | bone:Osteoblast               | wgEncodeBroadHistone |
| rs1256331 | H3K36me3 | chr1:21881080-21902435 | Osteobl  | bone:Osteoblast               | wgEncodeBroadHistone |
| rs1256331 | H3K4me1  | chr1:21890276-21896926 | Osteobl  | bone:Osteoblast               | wgEncodeBroadHistone |
| rs1256331 | H3K4me2  | chr1:21892998-21896321 | Osteobl  | bone:Osteoblast               | wgEncodeBroadHistone |



## ONLINE SUPPORTING MATERIAL

|           |          |                        |          |                                         |                      |
|-----------|----------|------------------------|----------|-----------------------------------------|----------------------|
| rs6664097 | H4K20me1 | chr1:21832439-21841269 | A549     | lung:Epithelial Cell                    | wgEncodeBroadHistone |
| rs6664097 | H3K4me2  | chr1:21834160-21837519 | CD20+    | blood:B-lymphocyte                      | wgEncodeBroadHistone |
| rs6664097 | H4K20me1 | chr1:21832714-21847825 | Dnd41    | blood:T-lymphocyte; Leukemia            | wgEncodeBroadHistone |
| rs6664097 | H4K20me1 | chr1:21830164-21849234 | GM12878  | blood:B-lymphocyte                      | wgEncodeBroadHistone |
| rs6664097 | H3K27ac  | chr1:21831818-21853187 | H1-hESC  | embryonic stem cell:embryonic stem cell | wgEncodeBroadHistone |
| rs6664097 | H3K36me3 | chr1:21829361-21850163 | H1-hESC  | embryonic stem cell:embryonic stem cell | wgEncodeBroadHistone |
| rs6664097 | H3K4me1  | chr1:21834142-21841715 | H1-hESC  | embryonic stem cell:embryonic stem cell | wgEncodeBroadHistone |
| rs6664097 | H3K4me2  | chr1:21834641-21838214 | H1-hESC  | embryonic stem cell:embryonic stem cell | wgEncodeBroadHistone |
| rs6664097 | H3K4me3  | chr1:21834493-21838408 | H1-hESC  | embryonic stem cell:embryonic stem cell | wgEncodeBroadHistone |
| rs6664097 | H3K79me2 | chr1:21827741-21886513 | H1-hESC  | embryonic stem cell:embryonic stem cell | wgEncodeBroadHistone |
| rs6664097 | H3K9ac   | chr1:21834647-21838352 | H1-hESC  | embryonic stem cell:embryonic stem cell | wgEncodeBroadHistone |
| rs6664097 | H4K20me1 | chr1:21828171-22115109 | H1-hESC  | embryonic stem cell:embryonic stem cell | wgEncodeBroadHistone |
| rs6664097 | H4K20me1 | chr1:21834085-21843716 | HMEC     | breast:Epithelial Cell                  | wgEncodeBroadHistone |
| rs6664097 | H3K36me3 | chr1:21828979-21915960 | HSMM     | muscle:Myoblast                         | wgEncodeBroadHistone |
| rs6664097 | H3K4me1  | chr1:21834400-21841508 | HSMM     | muscle:Myoblast                         | wgEncodeBroadHistone |
| rs6664097 | H3K4me2  | chr1:21834454-21840900 | HSMM     | muscle:Myoblast                         | wgEncodeBroadHistone |
| rs6664097 | H3K4me3  | chr1:21834459-21839640 | HSMM     | muscle:Myoblast                         | wgEncodeBroadHistone |
| rs6664097 | H3K9ac   | chr1:21834446-21840122 | HSMM     | muscle:Myoblast                         | wgEncodeBroadHistone |
| rs6664097 | H3K27ac  | chr1:21828182-21849981 | HSMMtube | muscle:Myotube                          | wgEncodeBroadHistone |
| rs6664097 | H3K36me3 | chr1:21833004-21853210 | HSMMtube | muscle:Myotube                          | wgEncodeBroadHistone |
| rs6664097 | H3K4me1  | chr1:21826693-21927461 | HSMMtube | muscle:Myotube                          | wgEncodeBroadHistone |
| rs6664097 | H3K4me1  | chr1:21834382-21841023 | HSMMtube | muscle:Myotube                          | wgEncodeBroadHistone |
| rs6664097 | H3K4me2  | chr1:21834404-21839992 | HSMMtube | muscle:Myotube                          | wgEncodeBroadHistone |
| rs6664097 | H3K4me3  | chr1:21834672-21839480 | HSMMtube | muscle:Myotube                          | wgEncodeBroadHistone |
| rs6664097 | H3K79me2 | chr1:21834395-21837677 | HSMMtube | muscle:Myotube                          | wgEncodeBroadHistone |
| rs6664097 | H3K9ac   | chr1:21834457-21839878 | HSMMtube | muscle:Myotube                          | wgEncodeBroadHistone |
| rs6664097 | H3K9me1  | chr1:21832579-21848617 | K562     | blood:Leukemia cell                     | wgEncodeBroadHistone |
| rs6664097 | H4K20me1 | chr1:17184307-25646596 | K562     | blood:Leukemia cell                     | wgEncodeBroadHistone |
| rs6664097 | H3K4me2  | chr1:21834391-21837118 | NH-A     | brain:astrocyte                         | wgEncodeBroadHistone |

## ONLINE SUPPORTING MATERIAL

|           |          |                        |               |                                         |                      |
|-----------|----------|------------------------|---------------|-----------------------------------------|----------------------|
| rs6664097 | H4K20me1 | chr1:21832971-21840272 | NHDF-Ad       | bronchial:Fibroblast                    | wgEncodeBroadHistone |
| rs6664097 | H4K20me1 | chr1:21828381-21848949 | NHEK          | skin:keratinocyte                       | wgEncodeBroadHistone |
| rs6664097 | H4K20me1 | chr1:21834416-21841922 | NHLF          | lung:Fibroblast                         | wgEncodeBroadHistone |
| rs6664097 | H4K20me1 | chr1:21830429-21875378 | Osteobl       | bone:Osteoblast                         | wgEncodeBroadHistone |
| rs6664097 | H3K4me2  | chr1:21834416-21839594 | Osteobl       | bone:Osteoblast                         | wgEncodeBroadHistone |
|           |          |                        |               |                                         |                      |
| rs1256342 | H4K20me1 | chr1:21852998-22050404 | Dnd41         | blood:T-lymphocyte; Leukemia            | wgEncodeBroadHistone |
| rs1256342 | H3K27ac  | chr1:21858946-21882075 | H1-hESC       | embryonic stem cell:embryonic stem cell | wgEncodeBroadHistone |
| rs1256342 | H3K4me1  | chr1:21855989-21885122 | H1-hESC       | embryonic stem cell:embryonic stem cell | wgEncodeBroadHistone |
| rs1256342 | H3K79me2 | chr1:21827741-21886513 | H1-hESC       | embryonic stem cell:embryonic stem cell | wgEncodeBroadHistone |
| rs1256342 | H4K20me1 | chr1:21828171-22115109 | H1-hESC       | embryonic stem cell:embryonic stem cell | wgEncodeBroadHistone |
| rs1256342 | H4K20me1 | chr1:21836544-23901982 | Hela-S3       | cervix:carcinoma                        | wgEncodeBroadHistone |
| rs1256342 | H3K27ac  | chr1:21859830-21885748 | HSMM          | muscle:Myoblast                         | wgEncodeBroadHistone |
| rs1256342 | H3K27ac  | chr1:21876086-21881777 | HSMM          | muscle:Myoblast                         | wgEncodeBroadHistone |
| rs1256342 | H3K36me3 | chr1:21828979-21915960 | HSMM          | muscle:Myoblast                         | wgEncodeBroadHistone |
| rs1256342 | H3K4me1  | chr1:21856365-21885706 | HSMM          | muscle:Myoblast                         | wgEncodeBroadHistone |
| rs1256342 | H3K4me1  | chr1:21876232-21878188 | HSMM          | muscle:Myoblast                         | wgEncodeBroadHistone |
| rs1256342 | H3K4me2  | chr1:21876368-21877578 | HSMM          | muscle:Myoblast                         | wgEncodeBroadHistone |
| rs1256342 | H3K79me2 | chr1:21834943-21878854 | HSMM          | muscle:Myoblast                         | wgEncodeBroadHistone |
| rs1256342 | H3K9ac   | chr1:21862560-21885410 | HSMM          | muscle:Myoblast                         | wgEncodeBroadHistone |
| rs1256342 | H3K4me1  | chr1:21826693-21927461 | HSMMtube      | muscle:Myotube                          | wgEncodeBroadHistone |
| rs1256342 | H3K79me2 | chr1:21869174-21878689 | HSMMtube      | muscle:Myotube                          | wgEncodeBroadHistone |
| rs1256342 | H3K4me1  | chr1:21876380-21878200 | K562          | blood:Leukemia cell                     | wgEncodeBroadHistone |
| rs1256342 | H4K20me1 | chr1:17184307-25646596 | K562          | blood:Leukemia cell                     | wgEncodeBroadHistone |
| rs1256342 | H3K4me1  | chr1:21876427-21877330 | CD14+_RO01746 | blood:Mononuclear Cell                  | wgEncodeBroadHistone |
| rs1256342 | H3K9ac   | chr1:21870065-21905328 | NH-A          | brain:astrocyte                         | wgEncodeBroadHistone |
| rs1256342 | H3K4me1  | chr1:21875753-21881643 | Osteobl       | bone:Osteoblast                         | wgEncodeBroadHistone |

<sup>1</sup>SNP, single nucleotide polymorphism.

<sup>2</sup>Based on National Center for Biotechnology Information – Genome Reference Consortium Human genome build 37/human genome 19 assembly.

## ONLINE SUPPORTING MATERIAL

**SUPPLEMENTAL TABLE 10** Transcription factor binding sites that coincide with base pair positions of SNPs associated with plasma pyridoxal 5'-phosphate concentration in healthy Irish adults<sup>1</sup>

| SNP       | Transcription factor | Location <sup>2</sup>  | Cell line     | Cell type                     | Data source           |
|-----------|----------------------|------------------------|---------------|-------------------------------|-----------------------|
| rs2275370 | Rad21                | chr1:21900378-21901669 | HCT-116       | colon:colorectal carcinoma    | wgEncodeHaibTfbs      |
| rs2275370 | CTCF                 | chr1:21900364-21901087 | A549          | lung:Epithelial Cell          | wgEncodeSydhTfbs      |
| rs2275370 | Max                  | chr1:21900405-21900437 | HepG2         | liver:carcinoma               | wgEncodeSydhTfbs      |
| rs2275370 | CHD1                 | chr1:21900282-21901159 | IMR90         | lung:Fibroblast (fetal)       | wgEncodeSydhTfbs      |
| rs2275370 | COREST               | chr1:21900339-21900878 | K562          | blood:Leukemia cell           | wgEncodeSydhTfbs      |
| rs2275370 | Znf143               | chr1:21900349-21900853 | K562          | blood:Leukemia cell           | wgEncodeSydhTfbs      |
| rs2275370 | CTCF                 | chr1:21899985-21901136 | SK-N-SH       | brain:Neuroblastoma           | wgEncodeSydhTfbs      |
| rs2275370 | Rad21                | chr1:21900103-21901304 | SK-N-SH       | brain:Neuroblastoma           | wgEncodeSydhTfbs      |
| rs2275370 | SMC3                 | chr1:21900244-21901196 | SK-N-SH       | brain:Neuroblastoma           | wgEncodeSydhTfbs      |
| rs2275370 | eGFP-JunD            | chr1:21900332-21901174 | K562          | blood:Leukemia cell           | wgEncodeUchicagoTfbs  |
|           |                      |                        |               |                               |                       |
| rs1780318 | Pol2                 | chr1:21895439-21895729 | H1-hESC       | embryonic stem cell           | wgEncodeOpenChromChip |
|           |                      |                        |               |                               |                       |
| rs1256331 | Pol2                 | chr1:21894952-21895122 | H1-hESC       | embryonic stem cell           | wgEncodeOpenChromChip |
| rs1256331 | Pol2                 | chr1:21895002-21895026 | MCF-7         | breast:adenocarcinoma         | wgEncodeOpenChromChip |
| rs1256331 | ZNF263               | chr1:21894970-21895362 | HEK293-T-REx  | kidney: (embryo)              | wgEncodeSydhTfbs      |
| rs1256331 | c-Fos                | chr1:21894712-21895209 | HUVEC         | blood vessel:Endothelial Cell | wgEncodeSydhTfbs      |
| rs1256331 | COREST               | chr1:21893570-21895197 | IMR90         | lung:Fibroblast (fetal)       | wgEncodeSydhTfbs      |
| rs1256331 | c-Fos                | chr1:21894875-21895084 | MCF10A-Er-Src | breast:Epithelial Cell        | wgEncodeSydhTfbs      |
| rs1256331 | c-Fos                | chr1:21894812-21895097 | MCF10A-Er-Src | breast:Epithelial Cell        | wgEncodeSydhTfbs      |
| rs1256331 | c-Fos                | chr1:21894808-21895115 | MCF10A-Er-Src | breast:Epithelial Cell        | wgEncodeSydhTfbs      |
| rs1256331 | c-Fos                | chr1:21894884-21895013 | MCF10A-Er-Src | breast:Epithelial Cell        | wgEncodeSydhTfbs      |
| rs1256331 | c-Myc                | chr1:21894858-21895043 | MCF10A-Er-Src | breast:Epithelial Cell        | wgEncodeSydhTfbs      |
|           |                      |                        |               |                               |                       |
| rs6664097 | USF-1                | chr1:21834460-21834722 | H1-hESC       | embryonic stem cell           | wgEncodeHaibTfbs      |
| rs6664097 | USF-1                | chr1:21834469-21834753 | K562          | blood:Leukemia cell           | wgEncodeHaibTfbs      |

## ONLINE SUPPORTING MATERIAL

|           |       |                        |         |                     |                  |
|-----------|-------|------------------------|---------|---------------------|------------------|
| rs6664097 | USF2  | chr1:21834496-21834703 | Hela-S3 | cervix:carcinoma    | wgEncodeSydhTfbs |
|           |       |                        |         |                     |                  |
| rs1256342 | CEBPB | chr1:21876492-21876774 | K562    | blood:Leukemia cell | wgEncodeSydhTfbs |
| rs1256342 | Pol2  | chr1:21873788-21877632 | K562    | blood:Leukemia cell | wgEncodeSydhTfbs |
| rs1256342 | RFX5  | chr1:21876446-21876631 | K562    | blood:Leukemia cell | wgEncodeSydhTfbs |

<sup>1</sup>SNP, single nucleotide polymorphism.

<sup>2</sup>Based on National Center for Biotechnology Information – Genome Reference Consortium Human genome build 37/human genome 19 assembly.

## ONLINE SUPPORTING MATERIAL

**SUPPLEMENTAL TABLE 11** Regions of RNA polymerase II-chromatin interaction that coincide with base pair positions of SNPs associated with plasma pyridoxal 5'-phosphate concentration in healthy Irish adults<sup>1</sup>

| SNP       | RNA polymerase II - Chromatin interaction regions <sup>2</sup> | Cell line | Cell type           | Data source        |
|-----------|----------------------------------------------------------------|-----------|---------------------|--------------------|
| rs1772719 | chr1:21895568..21902242 - chr1:21903321..21907610              | K562      | blood:Leukemia cell | wgEncodeGisChiaPet |
| rs2275370 | chr1:21835335..21836204 - chr1:21900257..21901466              | K562      | blood:Leukemia cell | wgEncodeGisChiaPet |
| rs1772720 | chr1:21895568..21902242 - chr1:21903321..21907610              | K562      | blood:Leukemia cell | wgEncodeGisChiaPet |
| rs9628653 | chr1:21834816..21836716 - chr1:21848420..21850010              | K562      | blood:Leukemia cell | wgEncodeGisChiaPet |
| rs1256342 | chr1:21875110..21878053 - chr1:21879038..21881539              | K562      | blood:Leukemia cell | wgEncodeGisChiaPet |

<sup>1</sup>SNP, single nucleotide polymorphism.

<sup>2</sup>Based on National Center for Biotechnology Information – Genome Reference Consortium Human genome build 37/human genome 19 assembly.

## ONLINE SUPPORTING MATERIAL

**SUPPLEMENTAL TABLE 12** SNPs associated with plasma pyridoxal 5'-phosphate concentration in healthy Irish adults and that are located in a binding site for an RNA binding protein encoded by the *PABPC1* gene<sup>1</sup>

| SNP        | Location <sup>2</sup>  | Cell line | Cell type          | Data source               |
|------------|------------------------|-----------|--------------------|---------------------------|
| rs1256335  | chr1:21835858-21904905 | GM12878   | Blood:B-lymphocyte | wgEncodeSunnyAlbanyGeneSt |
| rs1772719  | chr1:21835858-21904905 | GM12878   | Blood:B-lymphocyte | wgEncodeSunnyAlbanyGeneSt |
| rs2275370  | chr1:21835858-21904905 | GM12878   | Blood:B-lymphocyte | wgEncodeSunnyAlbanyGeneSt |
| rs4654748  | chr1:21835858-21904905 | GM12878   | Blood:B-lymphocyte | wgEncodeSunnyAlbanyGeneSt |
| rs12145027 | chr1:21835858-21904905 | GM12878   | Blood:B-lymphocyte | wgEncodeSunnyAlbanyGeneSt |
| rs1780318  | chr1:21835858-21904905 | GM12878   | Blood:B-lymphocyte | wgEncodeSunnyAlbanyGeneSt |
| rs1256331  | chr1:21835858-21904905 | GM12878   | Blood:B-lymphocyte | wgEncodeSunnyAlbanyGeneSt |
| rs1256341  | chr1:21835858-21904905 | GM12878   | Blood:B-lymphocyte | wgEncodeSunnyAlbanyGeneSt |
| rs1780315  | chr1:21835858-21904905 | GM12878   | Blood:B-lymphocyte | wgEncodeSunnyAlbanyGeneSt |
| rs6703976  | chr1:21835858-21904905 | GM12878   | Blood:B-lymphocyte | wgEncodeSunnyAlbanyGeneSt |
| rs1780329  | chr1:21835858-21904905 | GM12878   | Blood:B-lymphocyte | wgEncodeSunnyAlbanyGeneSt |
| rs9628653  | chr1:21835858-21904905 | GM12878   | Blood:B-lymphocyte | wgEncodeSunnyAlbanyGeneSt |
| rs869180   | chr1:21835858-21904905 | GM12878   | Blood:B-lymphocyte | wgEncodeSunnyAlbanyGeneSt |
| rs1256342  | chr1:21835858-21904905 | GM12878   | Blood:B-lymphocyte | wgEncodeSunnyAlbanyGeneSt |
| rs7536545  | chr1:21835858-21904905 | GM12878   | Blood:B-lymphocyte | wgEncodeSunnyAlbanyGeneSt |
| rs4021228  | chr1:21835858-21904905 | GM12878   | Blood:B-lymphocyte | wgEncodeSunnyAlbanyGeneSt |

<sup>1</sup>SNP, single nucleotide polymorphism; *PABPC1*, poly(A) binding protein, cytoplasmic 1.

<sup>2</sup>Based on National Center for Biotechnology Information – Genome Reference Consortium Human genome build 37/human genome 19 assembly.
